1 **E-cadherin is a structuring component of invadopodia in pancreatic cancer**

2

3 Aurélie Dobric<sup>1,3</sup>, Sébastien Germain<sup>1</sup>, Françoise Silvy<sup>1#</sup>, Rénaté Bonier<sup>1#</sup>, Stéphane  
4 Audebert<sup>2</sup>, Luc Camoin<sup>2</sup>, Nelson Dusetti<sup>1</sup>, Philippe Soubeyran<sup>1</sup>, Juan Iovanna<sup>1</sup>, Véronique  
5 Rigot<sup>1\*</sup>, Frédéric André<sup>1\*</sup>.

6 <sup>1</sup> Pancreatic Cancer Team, Centre de Recherche en Cancérologie de Marseille (CRCM),  
7 Institut Paoli-Calmettes, Aix-Marseille Université, Inserm, CNRS, 13009 Marseille, France

8 <sup>2</sup> Marseille Proteomics Platform, CRCM, Institut Paoli-Calmettes, Aix-Marseille Université,  
9 Inserm, CNRS, 13009 Marseille, France.

10 <sup>3</sup> Present address: Aix-Marseille Univ, CNRS, Developmental Biology Institute of Marseille  
11 (IBDM) Turing Center for Living Systems (Centuri), Parc Scientifique de Luminy, Marseille,  
12 France.

13 # both authors contribute equally to the work.

14 \*Corresponding authors:

15 Frédéric ANDRE: [frederic.andre@univ-amu.fr](mailto:frederic.andre@univ-amu.fr) ORCID # 0000-0001-5877-6387

16 Véronique RIGOT: [veronique.rigot@univ-amu.fr](mailto:veronique.rigot@univ-amu.fr) ORCID: # 0000-0002-6298-395X

17 **Running title:** E-cadherin and invadopodia formation

18 **Key words:** Cell invasion/EMT hybrid cells/Matrix degradation/Pancreatic cancer

19 **Graphical abstract**

20

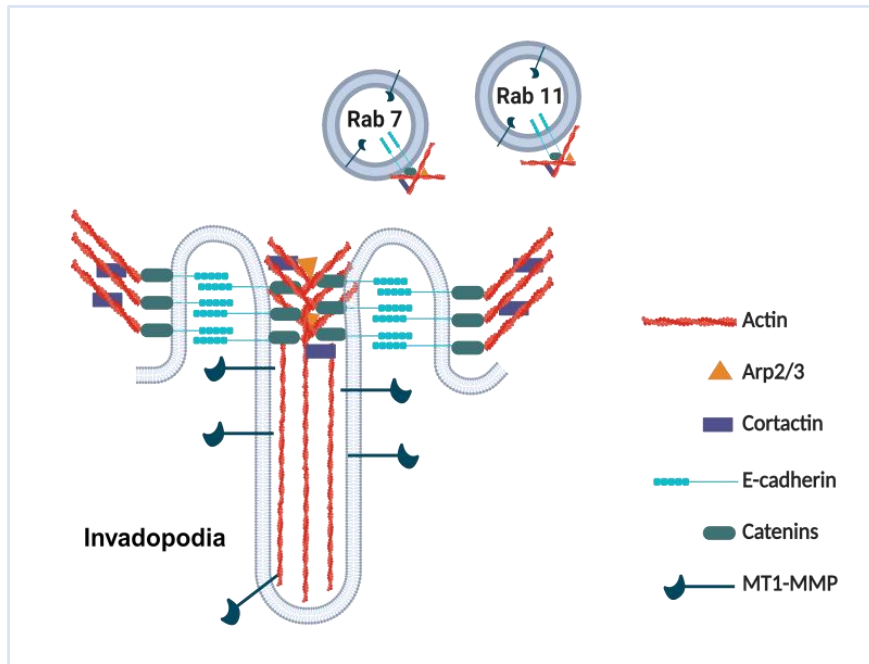

21

22

23

24

## 25 **Graphical abstract**

## 26 **Background**

27 The appearance of hybrid epithelial-mesenchymal (E/M) cells expressing E-cadherin is  
28 favourable for the establishment of pro-invasive function. However, the molecular mechanism  
29 and potential roles of E-cadherin in cancer cell invasion stay unexplored.

## 30 **Methods**

31 We used models of E/M hybrid cell lines, tissues sections and patient-derived xenografts from  
32 a multi-center clinical trial. E-cadherin involvement in invadopodia formation was assessed  
33 using a gelatin-FITC degradation assay. Mechanistic studies were performed by using  
34 proteomic analysis, siRNA strategy and proximity ligation assay.

## 35 **Results**

36 We showed that E-cadherin is a critical component of invadopodia. This unexpected  
37 localization results from a synergistic trafficking of E-cadherin and MT1-MMP through Rab  
38 vesicle-dependent pathway. Modulation of E-cadherin expression or activation impacted  
39 invadopodia formation. Moreover, colocalization of E-cadherin and Actin in “ring structures”  
40 as precursor of invadopodia reveals that E-cadherin is required for invadopodia structuration.

## 41 **Conclusion**

42 E-cadherin, initially localized in the adherens junctions could be recycled to nascent  
43 invadopodia where it will interact with several components such as Arp2/3, Cortactin or  
44 MT1-MMP. The trans-adhesive properties of E-cadherin are therefore essential for structuring  
45 invadopodia.

## 46 **Background**

47 The epithelial-to-mesenchymal transition (EMT) is a key biological process associated with  
48 the gain, either individually or collectively, of mesenchymal features and the acquisition of  
49 migration and invasion properties by cancer cells, conferring metastasis properties (Dongre &  
50 Weinberg, 2019). During this process, epithelial cells lose their apical-basal polarity, remodel  
51 their cytoskeleton and exhibit reduced cell-cell adhesion properties (Yang *et al*, 2020).

52 Studies have shown that EMT is a process with distinct intermediates, reflecting a progressive  
53 acquisition and a loss of mesenchymal and epithelial molecular traits. Such traits coexists in  
54 intermediates states, as documented by a mixture of epithelial and mesenchymal features at  
55 molecular and morphological levels (Pastushenko *et al*, 2018; Jolly *et al*, 2019; Kröger *et al*,  
56 2019). These « multiple shadows » mirror hybrid epithelial/mesenchymal (E/M) phenotypes  
57 of cells, with distinct biological properties (Pastushenko *et al*, 2018). In cancer, a hybrid E/M  
58 signature contributes to an intra-tumoural heterogeneity and is an indicator of poor prognosis,  
59 as cancer cells may metastasize with a partial loss of epithelial and a partial gain of  
60 mesenchymal traits (Andriani *et al*, 2016; Saitoh, 2018; Jolly *et al*, 2019; Simeonov *et al*,  
61 2021; Canciello *et al*, 2022).

62 Classical cadherins establish adhesion between neighbouring cells through their extracellular  
63 domain and ensure the cohesion required for tissue integrity (Niessen *et al*, 2011). Their  
64 intracellular domain is associated with catenins, which allow connection to the actin  
65 cytoskeleton and cell signalling pathways. Complete downregulation of epithelial E-cadherin  
66 associated with an up-regulation of N-cadherin and/or P-cadherin during the EMT process  
67 was historically considered a crucial step in carcinoma progression to promote invasion and  
68 metastasis (Thiery *et al*, 2009). However, a correlation between low E-cadherin expression,  
69 cell invasion and metastasis is not absolute. Indeed, studies have shown than tumour cells  
70 with epithelial traits and still expressing E-cadherin can undergo metastasis and form  
71 secondary tumours (Reddy *et al*, 2005; Lewis-Tuffin *et al*, 2010; Putzke *et al*, 2011; Sulaiman  
72 *et al*, 2018; Sommariva & Gagliano, 2020; Canciello *et al*, 2022). Moreover, E-cadherin was  
73 reported as a promoter of metastasis in models of invasive ductal breast carcinomas  
74 (Padmanaban *et al*, 2019; Shen & Kang, 2019). However, the molecular mechanisms  
75 involved in this process remain to be elucidated.

76 During metastasis progression, invading cells acquire the capability to degrade the  
77 extracellular matrix and ultimately invade the vasculature. These processes are driven by

78 invadopodia-actin rich protrusive plasma membrane structures that operate focalized  
79 proteolysis (Paterson & Courtneidge, 2018; Ferrari *et al*, 2019; Linder *et al*, 2023).

80 Key components of invadopodia include the scaffold protein Tks5, the actin regulators  
81 Cortactin, Wiskott–Aldrich syndrome protein family members, cofilin, and membrane type 1  
82 matrix metalloproteinase (MT1-MMP) (Paterson & Courtneidge, 2018). Invadopodia have  
83 been extensively studied in cell culture, and have been detected in vivo (Génot &  
84 Gligorijevic, 2014; Chen *et al*, 2019). Whereas significant advances have been made in  
85 understanding how invadopodia formation and activity are regulated, a putative role of  
86 cadherins in invadopodia organization remains unknown.

87 Pancreatic ductal adenocarcinoma (PDAC) is a cancer with poor prognosis (Siegel *et al*,  
88 2022). This aggressivity is due to a combination of factors including a lack of early diagnostic  
89 markers, lack of symptoms and an early metastatic spread. The desmoplastic reaction  
90 observed in PDAC is a hallmark of disease progression and prognosis. It is correlated with  
91 inflammation and a low vascularity. The presence of large amounts of extracellular matrix  
92 (ECM) components and tumour-infiltrating leukocytes are determinant in EMT evolution and  
93 therapeutic resistance (Beatty *et al*, 2021; Bhoopathi *et al*, 2023).

94  
95 PDAC encompasses a range of E/M hybrid cells, reflecting epithelial-mesenchymal plasticity  
96 (Andriani *et al*, 2016; Saitoh, 2018; Jolly *et al*, 2019; Simeonov *et al*, 2021). Intriguingly, it  
97 has been shown that some PDAC cells with high E-cadherin expression at the cell boundaries  
98 exhibit highly invasive and malignant behaviour (Sommariva & Gagliano, 2020). PDAC  
99 represents therefore an appropriate biological context to explore cadherins implication in  
100 invasive front migration and capabilities to form invadopodia.

101 The aim of this study is to decipher how in pancreatic cancer, E-cadherin modulates the  
102 ability of E/M hybrid cells to degrade ECM.

103

## 104 **Methods**

### 105 **Antibodies and reagents.**

106 Mouse anti-E-cadherin (M168 and HECD-1), rabbit anti-E-cadherin (EP700Y) and anti-Arp3  
107 (EPR110429) were from Abcam. Mouse anti-E-cadherin (24E10), rabbit anti-P-cadherin  
108 (21300S) and rabbit anti-Rab7 (D95F2) were from Cell Signaling. Mouse anti-Cortactin  
109 p80/p85 (4F11) and anti-MT1-MMP (LEM 2/15.8) were from Millipore. Goat anti-E-  
110 cadherin was from St John's Laboratory. Rabbit anti-Rab11 and rhodamine-conjugated  
111 phalloidin were from Life Technologies. Rabbit anti Tks5 was from Novus. Alexafluor 488,  
112 594, 647 secondary antibodies were from Thermo Fisher. Both AS9 (BAS00132635) and  
113 AS11 (BAS00602705) compounds were from Asinex.

114 **Cell culture.** The human pancreatic adenocarcinoma BxPC-3 cells, authenticated using short  
115 tandem repeat (STR) profiling (ATCC), were cultured as previously published (Siret *et al*,  
116 2018). E-cadherin was stably knocked down using shRNA lentiviral transduction particles as  
117 previously described (Siret *et al*, 2018). Primary cell cultures PDAC001T and PDAC021T  
118 derived from patient-derived xenograft (PDX) and SUM 149 cell line derived from  
119 inflammatory breast cancer were cultured as previously described, respectively (Fabre *et al*,  
120 1993; Hoffmeyer *et al*, 2005; Siret *et al*, 2018) E-cadherin deficient PDAC021T were  
121 transfected with human E-Cadherin mGFP-tagged Tagged ORF Clone Lentiviral Particle  
122 (Origene) at 25 multiplicity of infection (MOI). Infected cells were selected using 2.5µg/ml  
123 puromycin. E-cadherin expression was checked by western blot analysis.

124 **Reverse siRNA transfection.** ON-target plus smartpool human control, human MT1-MMP,  
125 human Arp3, human Rab7A and human Rab11A were from Dharmacon. Cells were seeded in  
126 6-well plates directly with the siRNA/transfection mix: 3µl of LipoRNAiMax (Life  
127 Technologies), 500µL of OptiMEM (Life Technologies), 25 or 50nM of indicated siRNA and  
128 2.5ml of RPMI/10% FCS medium. When required, transfected cells were detached and  
129 seeded on FITC-gelatin coated coverslips, 24 or 48 h after treatment.

130 **Subcutaneous xenografts of pancreatic cancer cells.** All experimental procedures involving  
131 animals were performed in accordance with French Guidelines and approved by the ethical  
132 committee of Marseille (agreement 50-31102012). BxPC-3 cells were harvested by mild  
133 trypsinisation, washed twice in PBS, then suspended in Matrigel at  $2 \times 10^6$  cells per 100 µl. To  
134 induce tumours, the cell suspension was injected subcutaneously (s.c.) into the flank of 6-8-  
135 week-old female NMRI-Foxn1nu/Foxn1nu mice (Charles River Laboratories, L'Arbresle,

136 France). Mice were sacrificed 3 weeks after inoculation. Tumours were removed and tissue  
137 specimens were fixed in 4% formalin then embedded in paraffin.

138 **Immunohistofluorescence.** Human pancreatic cancer samples were obtained as previously  
139 described (approval DC2013-1857) (Martinez *et al*, 2016). Human tissue specimens or mouse  
140 tumours were cut into 3 µm sections. After dewaxing and antigen retrieval at pH9, sections  
141 were incubated for double or triple staining with primary antibodies for 2 h at room  
142 temperature. After washing, the sections were incubated with Alexa Fluor-conjugated  
143 antibodies, washed, and mounted in aqueous mounting medium. Images were captured with  
144 an LSM 880 Zeiss confocal microscope equipped with ZEN Software (objective 40X).  
145 Colocalization quantifications were performed using Jacop plugging (FiJi software). Overlap  
146 coefficients were obtained by dividing the number of points in the overlap region (different channels)  
147 with the total numbers of points in one of the distributions (each channel).

148 **Indirect immunofluorescence microscopy.** Cells were fixed in 4% formaldehyde for 30 min  
149 then permeabilized and blocked with phosphate buffered saline/bovine serum albumin  
150 (PBS/BSA) 4% saponin 0.1% for 1 h. Cells were successively incubated with indicated  
151 primary antibodies in PBS/BSA 1% saponin 0.1% for 2 h at RT and with Alexa Fluor-  
152 conjugated secondary antibodies in PBS/BSA 1% saponin 0.1% for 1 h raised against mouse  
153 or rabbit immunoglobulins (Invitrogen). After washes, samples were mounted in ProLong  
154 Gold antifade reagent (Thermo Fisher Scientific). Images were acquired with an Sp5 Leica or  
155 LSM 880 Zeiss confocal microscopes equipped, respectively, with LAS AF Lite or ZEN  
156 Software. Z-Stack acquisitions (Range: 0.5µm) were performed using a 63X objective  
157 magnification and analysed through orthogonal projections using ImageJ software  
158 ([rsb.info.nih.gov/ij/](http://rsb.info.nih.gov/ij/)). Actin and E-cadherin ring structures were obtained using the ZEISS  
159 LSM880 AiryScan 2.5D module.

160 **Invadopodia assay.** Coverslips were coated with FITC-conjugated gelatin (Life  
161 Technologies), fixed with 0.5% glutaraldehyde and incubated for 3 min at RT with 5 mg/ml  
162 sodium borohydride (Sigma). After washes, 10<sup>4</sup> isolated cells were seeded on top of the  
163 coverslip. Cells were incubated 16 h at 37°C, fixed in 4% formaldehyde and stained for  
164 proteins of interest as described previously. The areas of degraded matrix were observed  
165 using a LSM880 Zeiss confocal microscope (20X objective). 15 microscopic fields per  
166 coverslip were acquired with all fluorescent channels.

167 **Kinetic of invadopodia formation.** Lab-Teck chamber coverglasses were coated as  
168 described for invadopodia assays. 2 hours after seeding, cells were incubated for 18h with

169 AS11 (0.01 mM) or DMSO in a temperature and CO<sub>2</sub> controlled chamber mounted on an  
170 Olympus IX83 inverted microscope. Cells were then washed and incubated in DMEM/10%  
171 FBS for an additional 24h period. Invadopodia formation was analysed by videomicroscopy  
172 by capturing images every hour using an orca-flash4 camera with a 40X objective.

173 **Immunoprecipitation.** BxPC-3 cells were plated in 10 cm<sup>2</sup> culture dishes. Subconfluent cells  
174 (70% of confluence) were lysed in ice with lysis buffer (50mM HEPES pH 7.5; 150 mM  
175 NaCl; 1 mM EDTA; 1 mM EGTA; Glycerol 10%; Triton X-100 1%; 25 mM NaF; 10 μM  
176 ZnCl<sub>2</sub> + protease inhibitor cocktail). Protein G Sepharose beads (Roche) were pre-incubated  
177 with 1 μg of indicated primary antibody for 2 h at 4°C. After washes, equal amounts of cell  
178 lysate were incubated with pre-incubated beads for 2 h at 4°C. After three washes in PBS,  
179 immunoprecipitated proteins were solubilized in Laemmli buffer, heated at 100°C for 5 min,  
180 and analysed by western blotting.

181 **Western Blotting.** Cells were lysed with 150mM RIPA Buffer (25mM Tris-HCl pH 8.0;  
182 150mM NaCl; 1% Triton-X100) containing protease inhibitor cocktail. Equal amounts of cell  
183 lysate (25μg) were resolved by SDS PAGE (8 or 10% polyacrylamide) and blotted onto a  
184 polyvinylidene difluoride (PVDF) membrane. Proteins were detected using indicated  
185 antibodies. Antigen-antibody complexes were revealed using the ECL detection system  
186 (Millipore) and detected using a Pxi imaging device (SynGene).

187 **Invadopodia fractioning.** The isolation of an enriched fraction of invadopodia was  
188 performed using previously published protocol (Attanasio *et al*, 2011). Cells were seeded at  
189 2.5x10<sup>5</sup> cells on 4 culture dishes (10 cm diameter) coated with non-fluorescent gelatin. After  
190 18 h, plates were washed in PBS containing 0.5 mM MgCl<sub>2</sub>, 1 mM CaCl<sub>2</sub>, then in five times  
191 diluted PBS containing 0.5 mM MgCl<sub>2</sub>, 1 mM CaCl<sub>2</sub>, and incubated for 15 min in the  
192 presence of 3 ml of the diluted PBS containing protease inhibitor mixture to induce cell  
193 swelling. Cell bodies were then sheared away using an L shaped Pasteur pipette with sealed  
194 end, to leave invadopodia embedded in the gelatin. The embedded invadopodia were then  
195 washed in PBS containing 0.5 mM MgCl<sub>2</sub>, 1 mM CaCl<sub>2</sub> until no cell body were visible on  
196 the dishes. Then the embedded invadopodia were scraped away with the gelatin into lysis  
197 buffer (150 mM NaCl, 1% NP40, 0,5% sodium deoxycholate, 0,1% sodium dodecyl sulphate,  
198 50 mM Tris base buffer pH 8, proteases inhibitor) and clarified by centrifugation (15 min,  
199 13,000 rpm at 4°C). The cell body fraction was further separated into cell body membranes  
200 and cytosol fractions by centrifugation at 9,000 g for 20 min at 4°C. The supernatant  
201 (cytosolic fraction) was discarded whereas the cell body membrane pellet obtained after  
202 centrifugation was solubilized in lysis buffer and clarified by centrifugation (15 min, 13,000



203 rpm at 4°C). Both invadopodia and cell membrane fractions were precipitated in 3 volumes of  
204 cold acetone overnight at -20°C, centrifuged and denatured. All the invadopodia membrane  
205 fraction corresponding for 4 dishes was loaded with 1/2 of cell body membrane fraction.

206

207 **Proximity ligation assay.** Proximity ligation assay (PLA) was performed according to the  
208 manufacturer's recommendations protocol (Duolink; Sigma). Briefly, cells were prepared as  
209 for indirect immunofluorescence. Cells were incubated with indicated primary antibodies for  
210 2h at RT. After washing, samples were incubated with the respective PLA probes (Duolink in  
211 situ probes anti-Rb PLUS and Duolink in situ probe anti-Mouse MINUS) for 1 h at 37°C,  
212 washed and then ligated for 30 min at 37°C. Amplification with polymerase was then  
213 performed for 100 min at 37°C in the dark. After washes, nuclei were stained with DAPI, and  
214 samples are mounted in ProLong Gold antifade reagent. Images were captured as described in  
215 the indirect immunofluorescence staining section.

216 **Mass spectrometry analysis.** Proteomic analysis from E-cadherin depleted cells (BxPC-3  
217 shEcad) were compared to control cells (BxPC-3 shCTRL) by label-free quantitative mass  
218 spectrometry analysis. Briefly we used 15 µg of each cell lysate for proceeding and trypsin  
219 digestion (Shevchenko *et al*, 1996). Details of samples preparation and data processing  
220 protocols (Perez-Riverol *et al*, 2019) are available in **additional data 1**.

221 **Pathway enrichment analysis.** Proteins identified by mass spectrometry were analysed with  
222 Ingenuity Pathway Analysis (IPA) software to study pathway enrichment. The statistical  
223 significance of the enrichment was calculated using FDR method ( $P$ -value < 0.05). Protein Z-  
224 score was calculated for each protein of the selected pathway. Z-score indicate the overall  
225 activation state.

226 **Statistics.** Data are presented as the mean ± SEM for three independent experiments  
227 performed in triplicate. Comparison between two conditions was made using the Mann-  
228 Witney test:  $P$  < 0.05 was considered statistically significant in all analyses and is indicated  
229 by “\*\*\*\*” when  $P$  < 0.001, “\*\*” when  $P$  < 0.01 and “\*” when  $P$  < 0.05.

230

## 231 Results

### 232 E-cadherin localizes within invadopodia.

233 We previously described that both E-cadherin and P-cadherin are jointly expressed at the cell  
234 surface of tumoural cells in a large proportion of PDAC, pointing to the importance of hybrid  
235 E/M cells expressing E-cadherin in this pathology (Siret *et al*, 2018). Previous studies have  
236 shown that E-cadherin at the cell boundaries exhibits highly invasive and malignant behaviour  
237 (Sommariva & Gagliano, 2020). To strengthen this function in pancreatic cancer, we used *in*  
238 *vitro* approaches to determine how E-cadherin regulates cell invasion by analysing the  
239 formation of invadopodia, an early step of the invasion process.

240 The hybrid E/M BxPC-3 cell model was first used since it express high levels of E-cadherin  
241 (Siret *et al*, 2018). X-Z confocal projections showed localization of actin spots with several  
242 invadopodia markers (Cortactin, Tks5 and MT1-MMP) within a degradation area of the  
243 FITC-labelled gelatin (**Fig.S1A, S1B & S1C**). Moreover, MMPs inhibitors (**Fig.S1D and**  
244 **S1E**) and MT1-MMP depletion by siRNA strategy (**Fig. S1F and S1G**) almost entirely  
245 reduced both the capacity of these cells to degrade gelatin and the number of cells forming  
246 invadopodia. MT-MMP1 depletion using siRNA strategy was controlled by western blot  
247 (**Fig.S1H**). This indicates that in hybrid E/M BxPC-3 cell model exhibits active invadopodia.

248 Immunostaining analysis, using antibodies raised either against the intracellular (**Fig.1A**) or  
249 the extracellular domain of E-cadherin (**Fig.1B**) revealed that a pool of E-cadherin is located  
250 at the invadopodial membrane. P-cadherin, also expressed by BxPC-3 cells (Siret *et al*, 2018),  
251 was not detected at the invadopodial membrane (**Fig.1C**), indicating a specificity of E-  
252 cadherin localization in invadopodia. Biochemical analysis on fraction enriched in  
253 invadopodia reassuringly confirmed the presence in the invasive structure of E-cadherin, in  
254 association with  $\beta$ -catenin. As observed in immunostaining analysis, P-cadherin is not  
255 detected in the invadopodia fraction by western-blot and could be considered as a negative  
256 control of cell membrane contamination. Histone H1 is not detected in invadopodia fraction  
257 as negative control for cell body contamination (Fig.1D).

258 E-cadherin was also detected in invadopodia of primary pancreatic cancer cells PDAC001T  
259 (**Fig.1E**) and SUM-149 cell line derived from inflammatory breast cancer (**Fig.1F**).  
260 Therefore, the localization of E-cadherin in invadopodia could be extended to other cell and  
261 cancer types.

### 262 E-cadherin localizes with Cortactin and Tks5 at invadopodia-like-structures in PDAC.

263 To confirm these observations in vivo, we immunostained E-cadherin on patient tissues, as  
264 well as Cortactin and Tks5. A Cortactin/Tks5/E-cadherin triple staining on tissue sections  
265 revealed that a pool of E-cadherin localizes with Cortactin and Tks5 at plasma membrane of  
266 cells localized in the contact with extracellular matrix (**Fig. 2A**). For each panel we quantified  
267 the overlap coefficients: for E-cadherin/cortactin (75.8%), E-cadherin/Tks5 (84.6%) and  
268 Tks5/cortactin (70.3%). This triple Cortactin/Tks5/E-cadherin colocalization was observed in 3  
269 out of 6 patient tissues indicating that invadopodia-like structures could be detected in patient  
270 tissues.

271 Moreover, Cortactin or Tks5 were immunostained with E-cadherin in human pancreatic  
272 cancer BxPC-3 cells that had been ectopically implanted in mice. On serial tissues sections,  
273 colocalization of Cortactin/E-cadherin and Cortactin/Tks5 were observed at tumour cell  
274 plasma membranes in close contact with the microenvironment (**Fig. 2B & 2C**). Overlap  
275 coefficients are: E-cadherin/cortactin (78.2%) and Tks5/cortactin (60.2%).

276 Even if these structures are not common, these data confirm, in vivo, the existence of interactions  
277 between E-cadherin and all the invadopodia components. This suggests the localization of E-  
278 cadherin inside invadopodia-like-structures.

### 279 **E-cadherin interacts with MT1-MMP in invadopodia and is recycled through Rab7 and** 280 **Rab11 pathways.**

281 To understand if this surprising localization of E-cadherin depends on a random distribution  
282 we first investigated the impact of cell-cell interaction on invadopodia formation. We  
283 observed that the number of invadopodia decreases in cells exhibiting intercellular contacts  
284 (**Fig.3A**), indicating a possible competition between the formation of cell-cell interactions and  
285 invadopodia. This suggests that the endocytic and exocytic fluxes of cell-cell contacts  
286 components are crucial for invadopodia activity.

287 Vesicular transport has been shown to be crucial for invadopodia formation by facilitating the  
288 trafficking of MT1-MMP to the plasma membrane (Linder, 2015). On the other hand, E-  
289 cadherin undergoes cycles of endocytosis, sorting and recycling to the plasma membrane  
290 through Rab7 and Rab11 vesicles (Brüser & Bogdan, 2017; Terciolo *et al*, 2017). We  
291 therefore assessed if E-cadherin interacts with MT1-MMP and if its targeting to invadopodia  
292 depends on the same recycling process. Biochemical studies showed that a pool of E-cadherin  
293 co-precipitates with MT1-MMP, thus suggesting that these molecules can associate together  
294 (**Fig.3B**). Furthermore, PLA documented E-cadherin interaction with MT1-MMP in different  
295 cellular localizations: cell membrane, cytoplasmic vesicles and within invadopodia structures

296 (**Fig.3C**). We found that both Rab7 (**Fig.3D**) or Rab11 (**Fig.3E**) depletion decrease the  
297 number of invadopodia containing E-cadherin. Moreover, E-cadherin-Rab7 (**Fig.3F**) and E-  
298 cadherin-Rab11 complexes (**Fig.3G**) were observed in several cytoplasmic vesicles some of  
299 which are localized in the immediate vicinity of the degradation areas. MT1-MMP was also  
300 detected in these compartments (**Fig.3H & 3I**). Altogether, these data indicate that E-cadherin  
301 is trafficked to invadopodia *via* an active recycling process through Rab7 and Rab11  
302 pathways. They also demonstrate that MT1-MMP and E-cadherin could interact with each  
303 other inside invadopodia and are trafficked through the same pathway.

#### 304 **E-cadherin adhesive activity is required for invadopodia formation.**

305 We next explored the role of E-cadherin in invadopodia formation and function using a  
306 cellular system engineered to silence E-cadherin expression by shRNA. Specifically, we  
307 generated stable BxPC-3 shEcad (E-cadherin depletion) and control BxPC-3 shCTRL (no  
308 cadherin depletion) cells (Siret *et al*, 2018). We found that E-cadherin silencing promotes a  
309 significant decrease in the number of cells forming invadopodia (**Fig.4A**). This was  
310 accompanied by a reduction of degradation areas (**Fig.4B**) and a significant decrease in the  
311 number of invasive structures per cell (**Fig.4C**). At the opposite, forced E-cadherin expression  
312 in E-cadherin deficient cells (**Fig.4D**) promotes (Dalle Vedove *et al*, 2019) a significant  
313 increase of degradation areas (**Fig.4D & 4E**).

314 E-cadherin requires interactions with catenins to be functional (Mège & Ishiyama, 2017).  
315 PLA indicated that E-cadherin associates with  $\beta$ -catenin within invadopodia (**Fig.4F**).  
316 Moreover, we found that two synthetic E-cadherin inhibitors, AS9 and AS11, which block  
317 trans-interactions of E-cadherin molecules in junctional complexes (Dalle Vedove *et al*, 2019)  
318 reduced the number of cells exhibiting invadopodia (**Fig.4G**). By using videomicroscopy we  
319 analysed the impact of AS11 on the kinetic of invadopodia formation. AS11 decreased the  
320 rate of invadopodia appearance by 75% for the cells that still perform invadopodia, since the  
321 slope of the curves is 0.325 for AS11 treated cells versus 1.346 for control cells (**Fig.4H and**  
322 **Fig.S2**). The inhibitory effect of AS11 is rescued by removing the compounds. Indeed, cells  
323 resume invadopodia formation after 8h of latency with the same speed than control cells,  
324 when the E-cadherin inhibitor is removed. The slopes of the curves are 0,567 for the cells  
325 previously treated with AS11 and 0,509 for the control cells. These data confirmed the  
326 presence of a pool of functional E-cadherin at the invadopodial membrane and strongly  
327 suggest a role of E-cadherin in invadopodia structuring.

#### 328 **An E-cadherin/Arp3 complex is detected into invadopodia.**

329 To determine the mechanisms by which E-cadherin expression could regulate the formation  
330 of invadopodia, we analysed by mass spectrometry the full proteome of E-cadherin depleted  
331 BxPC-3 cells (shEcad) versus cells expressing E-cadherin (shCTRL). We came up with a list  
332 of 64 proteins down-regulated and 80 proteins up-regulated when E-cadherin is depleted. The  
333 analysis of these data using the Ingenuity Pathway Analysis (IPA) software suggests at least 8  
334 signalling pathways deregulated upon E-cadherin depletion, of which some could be crucial  
335 for invadopodia formation (**Fig.5A and Fig. S3**). Among enriched pathways, the actin  
336 nucleation by ARP/WASP complex was particularly interesting as this complex has been  
337 described in E-cadherin trafficking (Kovacs *et al*, 2002). As expected, interactome analysis  
338 identified the Arp2/3 complex as a partner of E-cadherin and  $\beta$ -catenin interaction networks  
339 (**Fig.S3**). We therefore focused on this pathway and found that E-cadherin depletion induced  
340 a down-regulation of all members of the Arp2/3 complex (**Fig.5B**). Western blot analysis  
341 additionally showed down-regulation of Arp3 subunit expression in E-cadherin-silenced cells  
342 (**Fig.5C**). Furthermore, PLA experiments indicate that Arp3 associates with both Cortactin  
343 and E-cadherin close to gelatin degradation areas, suggesting E-cadherin/Arp3 complex  
344 implication in invadopodia structuring (**Fig.5D & 5E**).

345 To functionally assess the implication of E-cadherin/Arp3 complex on invadopodia  
346 formation, we generated Arp3-silenced cells (**Fig.5F**). Reassuringly, we found that Arp3  
347 depletion promoted a significant decrease in the number of invadopodia formed per cell  
348 (**Fig.5G**). Altogether, these data highlight the importance of the E-cadherin in the actin  
349 nucleation process through ARP/WASP complex. In the absence of the E-cadherin, Arp3 is  
350 down-regulated, and the actin nucleation does not take place, both preventing the formation of  
351 actin protrusions.

### 352 **E-cadherin is a structuring component of invadopodia.**

353 The association between E-cadherin and Arp3 promotes a signal for actin assembly during  
354 adherens junction formation (Kovacs *et al*, 2002). If the E-cadherin/Arp2/3 complex is  
355 involved in the structuring of invadopodia, this should be reflected in the observation of  
356 complex formation prior to matrix degradation.

357 In 12% of cells, both E-cadherin and Actin organizes into overlapping rings at the ventral cell  
358 surface prior gelatin degradation (Fig.6A step 1 and Fig.6B). If actin rings always associated  
359 with E-cadherin rings, the reverse is not true. This strongly suggest that E-cadherin ring  
360 structuration precedes actin assembly. Less frequently (3% of the cells) E-cadherin/Actin  
361 rings are associated with starting degradation area (Fig.6A step 2 and Fig.6B), indicating that  
362 these structures enriched in both E-cadherin and Actin represent invadopodia precursors. In

363 50% of the cells, large area of degradation accumulates with punctiform actin labelling  
364 associated or not with a E-cadherin staining. This suggests that after invadopodia maturation,  
365 E-cadherin dispersion precedes actin disassembly (**Fig.6A step 3 and Fig.6B**).  
366 We observed that a part of E-cadherin ring is localized less deeply than actin ring in  
367 invadopodia (**Fig.6C, D and E**). Moreover, analysis of the localization of the maximal  
368 labelling intensity of the 2 molecules confirm this observation (**Fig.6C and D**).  
369 Representation of the intensity of E-cadherin and Actin staining using Airyscan acquisitions,  
370 for a section taken 1.1 $\mu$ m from the bottom of the gelatin, shows that these rings are not  
371 blended into the background (**Fig 6E**).  
372 Taken together, these results demonstrate a structuring role for E-cadherin during invadopodia  
373 formation.  
374

375

## 376 **Discussion**

377 E-cadherin was associated for years as a tumour suppressor. However, high levels of E-  
378 cadherin expression have been demonstrated in various invasive and metastatic cancer with  
379 epithelial traits suggesting that E-cadherin may have inefficient suppressive activity or even  
380 worst, could promote metastasis instead of suppressing tumour progression (Putzke *et al*,  
381 2011; Padmanaban *et al*, 2019; Shen & Kang, 2019). Moreover, studies demonstrated that E-  
382 cadherin expression in E/M hybrid cells expressing E-cadherin might confer collective  
383 migratory ability to tumour cells, allowing them to survive during transit and colonization in  
384 distinct organs (Reichert *et al*, 2018; Shen & Kang, 2019).

385 To address the role of E-cadherin in PDAC aggressiveness, we modulated E-cadherin  
386 expression in pancreatic cell models and analysed the effect on cell invasion. According to  
387 our data, the contribution of E-cadherin on cancer cell invasion can be summarized as  
388 follows:

389 E-cadherin is an early component of invadopodia. (i) Originally localized in the adherens  
390 junctions, E-cadherin can be endocytosed and recycled back to the invadopodial membrane  
391 simultaneously with MT1-MMP. Both Rab7 and/or Rab11 vesicle-dependant pathways are  
392 required for this trafficking; (ii) Once translocated into the immature invadopodia, E-cadherin  
393 interacts with several components, such as Arp2/3 and Actin; (iii) In association with Actin,  
394 E-cadherin forms a ring that precedes invadopodia degradative activity; (iv) E-cadherin- $\beta$ -  
395 catenin trans-interactions at invadopodial membrane suggest the establishment of new  
396 adherens-like junctions, allowing actin tension required for the protrusion scaffold (*see*  
397 **graphical abstract**).

398 Invadopodia are hallmarks of various invasive cells (Yamaguchi, 2012; Meirson & Gil-Henn,  
399 2018; Luo *et al*, 2021; Linder *et al*, 2023). They have been extensively studied in cell culture  
400 and have now been detected in *in situ* tissue explants, tissue sections and *in vivo* models  
401 (Génot & Gligorijevic, 2014; Lohmer *et al*, 2014; Chen *et al*, 2019). Invadopodia are  
402 supposed to represent promising therapeutic target to prevent cancer metastasis (Luo *et al*,  
403 2021). Our *ex vivo* and *in vivo* results strengthen the physiological relevance of invadopodia  
404 in PDAC as the two most used invadopodia markers (Cortactin and Tks5) colocalize  
405 preferentially at cell plasma membranes in close contact with the extracellular matrix.  
406 According to this, we postulate that BxPC3 cell lines are a suitable research model for  
407 invadopodia studies in PDAC.

408 We provide multiple lines of evidence that E-cadherin is a key component of the invadopodial  
409 membrane. (1) E-cadherin localizes with both Cortactin and Tks5 close to the ECM  
410 surrounding tumour clusters in patient tissues; (2) a pool of E-cadherin but not P-cadherin is  
411 detected at the invadopodial membrane in the pancreatic BxPC-3 cell line, pancreatic cancer  
412 primary culture and a cell line derived from an inflammatory breast cancer. Moreover, E-  
413 cadherin interacts with the main components of invadopodia, including Cortactin, Tks5 and  
414 MT1-MMP. Furthermore, E-cadherin is distributed in invadopodia when cell–cell contacts are  
415 reduced. E-cadherin is trafficked to the invadopodial membrane, as MT1-MMP, through Rab7  
416 and Rab11 recycling routes; (3) E-cadherin is found in purified fraction of invadopodia; (4)  
417 Modulation of E-cadherin expression is associated with invadopodia formation. Likewise,  
418 inactivation of E-cadherin trans-interaction in junctional complexes by drugs reversibly  
419 blocked invadopodia development, (5) E-cadherin forms a ring that associates with actin ring  
420 to form an invadopodia precursor structure. Some other compounds of the junctional  
421 complexes, including tight junctions (ZO-1), and Gap junctions (Connexin 43), may regulate  
422 invadopodia formation (Hu *et al*, 2018; Chepied *et al*, 2020). However, their ability to  
423 organize invadopodia has not been described.

424 The Arp2/3 complex polymerizes actin filaments as branches from existing filaments and  
425 powers various cell processes including cell motility, endocytosis, vesicle trafficking and  
426 adherens junction stability (Krause & Gautreau, 2014; Pandit *et al*, 2020). Its impact on actin  
427 polymerisation is critical for invadopodia-based invasion by driving cell protrusions through  
428 the ECM and maintaining tight apposition of surface-exposed MT1-MMP with the ECM  
429 (Monteiro *et al*, 2013). Here, three lines of evidence suggest a link between E-cadherin and  
430 Arp2/3 complex. First, IPA identified Arp2/3 as a direct partner of the E-cadherin interaction  
431 network. This is in agreement with studies that implicated Arp2/3 complex as a key actin  
432 assembly factor at E-cadherin-mediated cell–cell contacts (Kovacs *et al*, 2002). Second, E-  
433 cadherin associates with Arp3 in invadopodia. Finally, E-cadherin depletion induces a  
434 downregulation of the members of the Arp2/3 complex. Therefore, impaired actin nucleation,  
435 and E-cadherin depletion, prevents the formation of the actin protrusion which normally  
436 sustains invadopodia.

437 From these results we postulate that E-cadherin allows the establishment of membrane  
438 junctions in invadopodia structures. Cadherins have been described as participating in the  
439 formation of junctions within a single cell. For instance CDHR5 and CDHR2, indirectly  
440 anchored with the core actin bundle, are known to orchestrate microvillus crosslinking in  
441 intestinal enterocytes (Dooley *et al*, 2022).



442 E-cadherin localization in invadopodia requires intracellular trafficking, including  
443 endocytosis and recycling via Rab7 or Rab11 vesicles dependent pathways. However,  
444 pathways involved in invadopodia activity, including Rab2A dependent vesicles and exocyst  
445 complex (Sakurai-Yageta *et al*, 2008; Kajiho *et al*, 2018) may also be involved in E-cadherin  
446 trafficking to invadopodia. Further works are needed to define exactly how E-cadherin is  
447 transported to invadopodia.

448 To summarize, we demonstrated that E-cadherin promotes pancreatic cancer cell invasion by  
449 regulating invadopodia formation. The proinvasive function of E-cadherin and its related  
450 signalling mechanism need to be further explored. Importantly, these findings open new  
451 avenues towards uncovering innovative options for earlier diagnosis and anti-invasive therapy  
452 of pancreatic cancer.

453 **Additional informations:**

454 AD, VR and FA conceived and designated the study and the experiments. AD, SG, VR, RB,  
455 FA, FS performed the experiments, AD, VR and SG analysed the data. SA performed the  
456 proteomic analysis, PS, IJ and ND provide inputs of the study. AD, VR and FA wrote the  
457 manuscript.

458 **Acknowledgements:** The authors thank Philippe Chavrier (Institut Curie, Paris, France) for  
459 providing helpful advice at the beginning of the project, Magalie Benard (PRIMACEN  
460 Rouen, France) Sylvie Thuault and Eric Mas (CRCM) for discussions. We thank Flavio  
461 Maina and Avais Daulat for their feedbacks and suggestions on the written manuscript. We  
462 thank Magda Rodrigues (CRCM Misc platform) for support and advice. Proteomic analyses  
463 were performed at the mass spectrometry facility of Marseille Proteomics supported by IBISA  
464 (Infrastructure Biologie Santé et Agronomie), Plateforme Technologique Aix-Marseille,  
465 Cancéropole PACA, Région Sud-Provence-Alpes-Côte d'Azur, Fonds Européen de  
466 Développement Régional (FEDER) and Plan Cancer. We are grateful to the ICEP  
467 (IPC/CRCM experimental pathology) core-facility for histological processing of tumour  
468 samples.

469 **Funding information:** This work was supported by INCa (Grants number 2018-078 and  
470 2018-079), Cancéropôle PACA, DGOS (labellisation SIRIC), Amidex Foundation, Ligue  
471 contre le Cancer, Fondation de France and INSERM.

472 **Data availability:**

473 The mass spectrometry proteomics data have been deposited to the ProteomeXchange  
474 Consortium (<http://www.proteomexchange.org>) via the PRIDE partner repository with the  
475 dataset identifier PRIDE: PXD017895.

476 **Competing Interests:** The authors declare no conflict of interest.

477

## 478 **References**

- 479 Andriani F, Bertolini G, Facchinetti F, Baldoli E, Moro M, Casalini P, Caserini R, Milione M, Leone  
480 G, Pelosi G, Pastorino U, Sozzi G, Roz L (2016) Conversion to stem-cell state in response to  
481 microenvironmental cues is regulated by balance between epithelial and mesenchymal features in  
482 lung cancer cells. *Molecular Oncology* **10**: 253–271, doi:10.1016/j.molonc.2015.10.002.
- 483 Attanasio F, Caldieri G, Giacchetti G, van Horssen R, Wieringa B, Buccione R (2011) Novel  
484 invadopodia components revealed by differential proteomic analysis. *European Journal of Cell*  
485 *Biology* **90**: 115–127, doi:10.1016/j.ejcb.2010.05.004.
- 486 Beatty GL, Werba G, Lyssiotis CA, Simeone DM (2021) The biological underpinnings of therapeutic  
487 resistance in pancreatic cancer. *Genes Dev* **35**: 940–962, doi:10.1101/gad.348523.121.
- 488 Bhoopathi P, Mannangatti P, Das SK, Fisher PB, Emdad L (2023) Chemoresistance in pancreatic  
489 ductal adenocarcinoma: Overcoming resistance to therapy. *Adv Cancer Res* **159**: 285–341,  
490 doi:10.1016/bs.acr.2023.02.010.
- 491 Brüser L, Bogdan S (2017) Adherens Junctions on the Move—Membrane Trafficking of E-Cadherin.  
492 *Cold Spring Harb Perspect Biol* **9**: a029140, doi:10.1101/cshperspect.a029140.
- 493 Canciello A, Cerveró-Varona A, Peserico A, Mauro A, Russo V, Morrione A, Giordano A, Barboni  
494 B (2022) ‘In medio stat virtus’: Insights into hybrid E/M phenotype attitudes. *Front Cell Dev Biol* **10**:  
495 1038841, doi:10.3389/fcell.2022.1038841.
- 496 Chen Y-C, Baik M, Byers JT, Chen KT, French SW, Díaz B (2019) TKS5-positive invadopodia-like  
497 structures in human tumour surgical specimens. *Experimental and Molecular Pathology* **106**: 17–26,  
498 doi:10.1016/j.yexmp.2018.11.005.
- 499 Chepied A, Daoud-Omar Z, Meunier-Balandre A-C, Laird DW, Mesnil M, Defamie N (2020)  
500 Involvement of the Gap Junction Protein, Connexin43, in the Formation and Function of Invadopodia  
501 in the Human U251 Glioblastoma Cell Line. *Cells* **9**: doi:10.3390/cells9010117.
- 502 Dalle Vedove A, Falchi F, Donini S, Dobric A, Germain S, Di Martino GP, Prosdociami T, Vettraino  
503 C, Torretta A, Cavalli A, Rigot V, André F, Parisini E (2019) Structure-Based Virtual Screening  
504 Allows the Identification of Efficient Modulators of E-Cadherin-Mediated Cell-Cell Adhesion. *Int J*  
505 *Mol Sci* **20**: doi:10.3390/ijms20143404.
- 506 Dongre A, Weinberg RA (2019) New insights into the mechanisms of epithelial–mesenchymal  
507 transition and implications for cancer. *Nature Reviews Molecular Cell Biology* **20**: 69–84,  
508 doi:10.1038/s41580-018-0080-4.
- 509 Dooley SA, Engevik KA, Digrazia J, Stubler R, Kaji I, Krystofiak E, Engevik AC (2022) Myosin 5b  
510 is required for proper localization of the intermicrovillar adhesion complex in the intestinal brush  
511 border. *Am J Physiol Gastrointest Liver Physiol* **323**: G501–G510, doi:10.1152/ajpgi.00212.2022.
- 512 Fabre C, el Battari A, Bellan C, Pasqualini E, Marvaldi J, Lombardo D, Luis J (1993)  
513 Characterization of the oligosaccharide moiety of VIP receptor from the human pancreatic cell line  
514 BxPC-3. *Peptides* **14**: 1331–1338, doi:10.1016/0196-9781(93)90194-1.
- 515 Ferrari R, Martin G, Tagit O, Guichard A, Cambi A, Voituriez R, Vassilopoulos S, Chavrier P (2019)  
516 MT1-MMP directs force-producing proteolytic contacts that drive tumour cell invasion. *Nat Commun*  
517 **10**: doi:10.1038/s41467-019-12930-y.

- 518 Génot E, Gligorijevic B (2014) Invadosomes in their natural habitat. *European Journal of Cell*  
519 *Biology* **93**: 367–379, doi:10.1016/j.ejcb.2014.10.002.
- 520 Hoffmeyer MR, Wall KM, Dharmawardhane SF (2005) In vitro analysis of the invasive phenotype of  
521 SUM 149, an inflammatory breast cancer cell line. *Cancer Cell Int* **5**: 1–10, doi:10.1186/1475-2867-  
522 5-11.
- 523 Hu D, Ansari D, Pawłowski K, Zhou Q, Sasor A, Welinder C, Kristl T, Bauden M, Rezeli M, Jiang  
524 Y, Marko-Varga G, Andersson R (2018) Proteomic analyses identify prognostic biomarkers for  
525 pancreatic ductal adenocarcinoma. *Oncotarget* **9**: 9789–9807, doi:10.18632/oncotarget.23929.
- 526 Jolly MK, Somarelli JA, Sheth M, Biddle A, Tripathi SC, Armstrong AJ, Hanash SM, Bapat SA,  
527 Rangarajan A, Levine H (2019) Hybrid epithelial/mesenchymal phenotypes promote metastasis and  
528 therapy resistance across carcinomas. *Pharmacology & Therapeutics* **194**: 161–184,  
529 doi:10.1016/j.pharmthera.2018.09.007.
- 530 Kajiho H, Kajiho Y, Scita G (2018) Harnessing membrane trafficking to promote cancer spreading  
531 and invasion: The case of RAB2A. *Small GTPases* **9**: 304–309,  
532 doi:10.1080/21541248.2016.1223990.
- 533 Kovacs EM, Goodwin M, Ali RG, Paterson AD, Yap AS (2002) Cadherin-Directed Actin Assembly:  
534 E-Cadherin Physically Associates with the Arp2/3 Complex to Direct Actin Assembly in Nascent  
535 Adhesive Contacts. *Current Biology* **12**: 379–382, doi:10.1016/S0960-9822(02)00661-9.
- 536 Krause M, Gautreau A (2014) Steering cell migration: lamellipodium dynamics and the regulation of  
537 directional persistence. *Nature Reviews Molecular Cell Biology* **15**: 577–590, doi:10.1038/nrm3861.
- 538 Kröger C, Afeyan A, Mraz J, Eaton EN, Reinhardt F, Khodor YL, Thiru P, Bierie B, Ye X, Burge  
539 CB, Weinberg RA (2019) Acquisition of a hybrid E/M state is essential for tumourigenicity of basal  
540 breast cancer cells. *Proc Natl Acad Sci USA* **116**: 7353–7362, doi:10.1073/pnas.1812876116.
- 541 Lewis-Tuffin LJ, Rodriguez F, Giannini C, Scheithauer B, Necela BM, Sarkaria JN, Anastasiadis PZ  
542 (2010) Misregulated E-cadherin expression associated with an aggressive brain tumour phenotype.  
543 *PLoS ONE* **5**: e13665, doi:10.1371/journal.pone.0013665.
- 544 Linder S (2015) MT1-MMP: Endosomal delivery drives breast cancer metastasis. *Journal of Cell*  
545 *Biology* **211**: 215–217, doi:10.1083/jcb.201510009.
- 546 Linder S, Cervero P, Eddy R, Condeelis J (2023) Mechanisms and roles of podosomes and  
547 invadopodia. *Nat Rev Mol Cell Biol* **24**: 86–106, doi:10.1038/s41580-022-00530-6.
- 548 Lohmer LL, Kelley LC, Hagedorn EJ, Sherwood DR (2014) Invadopodia and basement membrane  
549 invasion in vivo. *Cell Adh Migr* **8**: 246–255, doi:10.4161/cam.28406.
- 550 Luo Y, Hu J, Liu Y, Li L, Li Y, Sun B, Kong R (2021) Invadopodia: A potential target for pancreatic  
551 cancer therapy. *Critical Reviews in Oncology/Hematology* **159**: 103236,  
552 doi:10.1016/j.critrevonc.2021.103236.
- 553 Martinez E, Crenon I, Silvy F, Grande JD, Mougel A, Barea D, Fina F, Bernard J-P, Ouaisi M,  
554 Lombardo D, Mas E (2016) Expression of truncated bile salt-dependent lipase variant in pancreatic  
555 pre-neoplastic lesions. *Oncotarget* **8**: 536–551, doi:10.18632/oncotarget.11777.
- 556 Meirson T, Gil-Henn H (2018) Targeting invadopodia for blocking breast cancer metastasis. *Drug*  
557 *Resistance Updates* **39**: 1–17, doi:10.1016/j.drug.2018.05.002.

- 558 Monteiro P, Rossé C, Castro-Castro A, Irondelle M, Lagoutte E, Paul-Gilloteaux P, Desnos C,  
559 Formstecher E, Darchen F, Perrais D, Gautreau A, Hertzog M, Chavrier P (2013) Endosomal WASH  
560 and exocyst complexes control exocytosis of MT1-MMP at invadopodia. *J Cell Biol* **203**: 1063–  
561 1079, doi:10.1083/jcb.201306162.
- 562 Niessen CM, Leckband D, Yap AS (2011) Tissue organization by cadherin adhesion molecules:  
563 dynamic molecular and cellular mechanisms of morphogenetic regulation. *Physiol Rev* **91**: 691–731,  
564 doi:10.1152/physrev.00004.2010.
- 565 Padmanaban V, Krol I, Suhail Y, Szczerba BM, Aceto N, Bader JS, Ewald AJ (2019) E-cadherin is  
566 required for metastasis in multiple models of breast cancer. *Nature* **573**: 439–444,  
567 doi:10.1038/s41586-019-1526-3.
- 568 Pandit NG, Cao W, Bibeau J, Johnson-Chavarria EM, Taylor EW, Pollard TD, De La Cruz EM  
569 (2020) Force and phosphate release from Arp2/3 complex promote dissociation of actin filament  
570 branches. *Proc Natl Acad Sci USA* **117**: 13519–13528, doi:10.1073/pnas.1911183117.
- 571 Pastushenko I, Brisebarre A, Sifrim A, Fioramonti M, Revenco T, Boumahdi S, Van Keymeulen A,  
572 Brown D, Moers V, Lemaire S, De Clercq S, Minguijón E, Balsat C, Sokolow Y, Dubois C, De Cock  
573 F, Scozzaro S, Sopena F, Lanas A, D’Haene N, Salmon I, Marine J-C, Voet T, Sotiropoulou PA,  
574 Blanpain C (2018) Identification of the tumour transition states occurring during EMT. *Nature* **556**:  
575 463–468, doi:10.1038/s41586-018-0040-3.
- 576 Paterson EK, Courtneidge SA (2018) Invadosomes are coming: new insights into function and  
577 disease relevance. *FEBS J* **285**: 8–27, doi:10.1111/febs.14123.
- 578 Perez-Riverol Y, Csordas A, Bai J, Bernal-Llinares M, Hewapathirana S, Kundu DJ, Inuganti A,  
579 Griss J, Mayer G, Eisenacher M, Pérez E, Uszkoreit J, Pfeuffer J, Sachsenberg T, Yilmaz S, Tiwary  
580 S, Cox J, Audain E, Walzer M, Jarnuczak AF, Ternent T, Brazma A, Vizcaíno JA (2019) The PRIDE  
581 database and related tools and resources in 2019: improving support for quantification data. *Nucleic  
582 Acids Res* **47**: D442–D450, doi:10.1093/nar/gky1106.
- 583 Putzke AP, Ventura AP, Bailey AM, Akture C, Opoku-Ansah J, Celiktaş M, Hwang MS, Darling DS,  
584 Coleman IM, Nelson PS, Nguyen HM, Corey E, Tewari M, Morrissey C, Vessella RL, Knudsen BS  
585 (2011) Metastatic progression of prostate cancer and e-cadherin regulation by zeb1 and SRC family  
586 kinases. *Am J Pathol* **179**: 400–410, doi:10.1016/j.ajpath.2011.03.028.
- 587 Reddy P, Liu L, Ren C, Lindgren P, Boman K, Shen Y, Lundin E, Ottander U, Rytinki M, Liu K  
588 (2005) Formation of E-cadherin-mediated cell-cell adhesion activates AKT and mitogen activated  
589 protein kinase via phosphatidylinositol 3 kinase and ligand-independent activation of epidermal  
590 growth factor receptor in ovarian cancer cells. *Mol Endocrinol* **19**: 2564–2578, doi:10.1210/me.2004-  
591 0342.
- 592 Reichert M, Bakir B, Moreira L, Pitarresi JR, Feldmann K, Simon L, Suzuki K, Maddipati R, Rhim  
593 AD, Schlitter AM, Kriegsmann M, Weichert W, Wirth M, Schuck K, Schneider G, Saur D, Reynolds  
594 AB, Klein-Szanto AJ, Pehlivanoglu B, Memis B, Adsay NV, Rustgi AK (2018) Regulation of  
595 Epithelial Plasticity Determines Metastatic Organotropism in Pancreatic Cancer. *Dev Cell* **45**: 696-  
596 711.e8, doi:10.1016/j.devcel.2018.05.025.
- 597 Saitoh M (2018) Involvement of partial EMT in cancer progression. *The Journal of Biochemistry*  
598 **164**: 257–264, doi:10.1093/jb/mvy047.

- 599 Sakurai-Yageta M, Recchi C, Le Dez G, Sibarita J-B, Daviet L, Camonis J, D'Souza-Schorey C,  
600 Chavrier P (2008) The interaction of IQGAP1 with the exocyst complex is required for tumour cell  
601 invasion downstream of Cdc42 and RhoA. *J Cell Biol* **181**: 985–998, doi:10.1083/jcb.200709076.
- 602 Shen M, Kang Y (2019) Role Reversal: A Pro-metastatic Function of E-Cadherin. *Developmental*  
603 *Cell* **51**: 417–419, doi:10.1016/j.devcel.2019.10.028.
- 604 Shevchenko A, Jensen ON, Podtelejnikov AV, Sagliocco F, Wilm M, Vorm O, Mortensen P,  
605 Shevchenko A, Boucherie H, Mann M (1996) Linking genome and proteome by mass spectrometry:  
606 Large-scale identification of yeast proteins from two dimensional gels. *PNAS* **93**: 14440–14445,  
607 doi:10.1073/pnas.93.25.14440.
- 608 Siegel RL, Miller KD, Fuchs HE, Jemal A (2022) Cancer statistics, 2022. *CA: A Cancer Journal for*  
609 *Clinicians* **72**: 7–33, doi:10.3322/caac.21708.
- 610 Simeonov KP, Byrns CN, Clark ML, Norgard RJ, Martin B, Stanger BZ, Shendure J, McKenna A,  
611 Lengner CJ (2021) Single-cell lineage tracing of metastatic cancer reveals selection of hybrid EMT  
612 states. *Cancer Cell* doi:10.1016/j.ccell.2021.05.005.
- 613 Siret C, Dobric A, Martirosyan A, Terciolo C, Germain S, Bonier R, Dirami T, Dusetti N, Tomasini  
614 R, Rubis M, Garcia S, Iovanna J, Lombardo D, Rigot V, André F (2018) Cadherin-1 and cadherin-3  
615 cooperation determines the aggressiveness of pancreatic ductal adenocarcinoma. *British Journal of*  
616 *Cancer* **118**: 546–557, doi:10.1038/bjc.2017.411.
- 617 Sommariva M, Gagliano N (2020) E-Cadherin in Pancreatic Ductal Adenocarcinoma: A Multifaceted  
618 Actor during EMT. *Cells* **9**: 1040, doi:10.3390/cells9041040.
- 619 Sulaiman A, Yao Z-M, Wang L-S (2018) Re-evaluating the role of epithelial-mesenchymal-transition  
620 in cancer progression. *J Biomed Res* **32**: 81–90, doi:10.7555/JBR.31.20160124.
- 621 Terciolo C, Dobric A, Ouaisi M, Siret C, Breuzard G, Silvy F, Marchiori B, Germain S, Bonier R,  
622 Hama A, Owens R, Lombardo D, Rigot V, André F (2017) *Saccharomyces boulardii* CNCM I-745  
623 Restores intestinal Barrier Integrity by Regulation of E-cadherin Recycling. *J Crohns Colitis* **11**:  
624 999–1010, doi:10.1093/ecco-jcc/jjx030.
- 625 Thiery JP, Acloque H, Huang RYJ, Nieto MA (2009) Epithelial-Mesenchymal Transitions in  
626 Development and Disease. *Cell* **139**: 871–890, doi:10.1016/j.cell.2009.11.007.
- 627 Yamaguchi H (2012) Pathological roles of invadopodia in cancer invasion and metastasis. *European*  
628 *Journal of Cell Biology* **91**: 902–907, doi:10.1016/j.ejcb.2012.04.005.
- 629 Yang J, Antin P, Berx G, Blanpain C, Brabletz T, Bronner M, Campbell K, Cano A, Casanova J,  
630 Christofori G, Dedhar S, Derynck R, Ford HL, Fuxe J, García de Herreros A, Goodall GJ,  
631 Hadjantonakis A-K, Huang RJY, Kalcheim C, Kalluri R, Kang Y, Khew-Goodall Y, Levine H, Liu J,  
632 Longmore GD, Mani SA, Massagué J, Mayor R, McClay D, Mostov KE, Newgreen DF, Nieto MA,  
633 Puisieux A, Runyan R, Savagner P, Stanger B, Stemmler MP, Takahashi Y, Takeichi M, Theveneau  
634 E, Thiery JP, Thompson EW, Weinberg RA, Williams ED, Xing J, Zhou BP, Sheng G (2020)  
635 Guidelines and definitions for research on epithelial–mesenchymal transition. *Nature Reviews*  
636 *Molecular Cell Biology* 1–12, doi:10.1038/s41580-020-0237-9.

## 637 **Legends**

638

639 **Fig.1: E-cadherin localizes within invadopodia.**

640 Pancreatic cancer BxPC-3 cell line (A-C), pancreatic cancer primary culture PDAC001T (E) and  
641 breast cancer cells SUM-149 cell line (F) were cultured on FITC-labelled gelatin. Cells were stained  
642 for actin with phalloidin-rhodamin (red) and E-cadherin using an antibody raised against the  
643 cytoplasmic domain (blue) (A) or extracellular domain (B) or P-cadherin (C). An actin spot  
644 localization with a degradation zone of the FITC-labelled gelatin represents an active invadopodia.  
645 Top panel: Images represent Z-stack confocal acquisitions. Scale bar = 10  $\mu\text{m}$  (A, B) or 2  $\mu\text{m}$  (C, E,  
646 F). Bottom panel: fluorescence intensity quantification of the region of interest indicated by the  
647 yellow square on the top panel. The gelatin degradation area is identified in grey. (D) The BxPC-3  
648 cell body membrane and invadopodia membrane were enriched as described in Methods, subjected to  
649 SDS-PAGE and transferred onto nitro-cellulose membrane. Tks5, E-cadherin, MT1-MMP, P-  
650 cadherin, Actin and Histone H1 were sequentially detected by western blot in the same membrane.  
651 Images in 2D view for (A) and (C) are available in *Fig.S4A*. (A): A representative image of 7  
652 experiments with 5 acquisitions for each (n=7), (B-C): A representative image of 3 experiments with  
653 5 acquisitions for each (n=3), (D): One experiment representative of 3, (E-F): A representative image  
654 of 2 experiments with 5 acquisitions for each (n=2).

655  
656 **Fig.2: E-cadherin localizes in invadopodia-like structures *in vivo*.**

657 (A) Triple E-cadherin, Tks5, and Cortactin immunostaining in sections from patient tumours. White  
658 squares represent magnified views. White arrow indicates invadopodia containing E-Cadherin. Scale  
659 bars represent 10  $\mu\text{m}$  (top panel) or 2  $\mu\text{m}$  (magnification panel). The triple Cortactin/Tks5/E-cadherin  
660 colocalization was observed in 3 out of 6 patient tissues (n=6).

661 (B) E-cadherin and Cortactin or (C) E-cadherin and Tks5 double immunostaining in serial sections  
662 from subcutaneous tumours of BxPC3 cells implanted in mice. Nuclei were stained using Dapi.  
663 White squares represent magnified views. White arrows indicate spots of Cortactin, Tks5 and E-  
664 cadherin colocalization. Scale bars represent 40  $\mu\text{m}$  (top panels) or 10  $\mu\text{m}$  (magnification panel).

665  
666 **Fig.3: E-cadherin interacts with MT1-MMP in invadopodia and is recycled through Rab7 and  
667 Rab11 pathways.**

668 (A) Cell-cell interactions inhibited invadopodia formation. The number of invadopodia per cell was  
669 measured as described in Methods section. The graph represents the distribution of invadopodia in  
670 isolated cells (1 cell), cell doublet (2 cells) or groups superior of 2 cells (> 2 cells). Raw data are  
671 shown with coloured dots. Mean from 2 independent experiments are indicated with coloured  
672 squares. Errors bars represent mean  $\pm$  SEM. n=2. (B) Equal amounts of BxPC-3 cell lysate were

immunoprecipitated using either anti-MT1-MMP or non-specific (IgG) antibodies. After SDS-PAGE and transfer onto PVDF membrane, protein complexes were detected using anti-E-cadherin or anti-MT1-MMP antibodies. Control was performed using BxPC-3 lysates. A representative experiment of 3 (n=3) (C) E-cadherin and MT1-MMP colocalize inside invadopodia. After E-cadherin and MT1-MMP immunostaining, E-cadherin–MT1-MMP complexes were detected using PLA. Z-stack confocal acquisitions were performed. Top panel: The amplification spots (in red) localize in a gelatin-degradation area. Scale bar = 2  $\mu$ m. Bottom panel: Fluorescence intensity quantification of the region of interest indicated by the yellow square on the top panel. The gelatin degradation area is identified in grey. A representative image of 2 experiments in triplicates with 3 acquisitions for each (n=2).

(D-E) BxPC-3 cells were treated for 48h with siRNA control (siCTRL) or siRNA against (D,) Rab7 (siRab7) or (E,) Rab11 (siRab11) before invadopodia assay.

(D, E) Left panel: Quantification of active invadopodia at the ventral surface of each cell. Right panel: Quantification of active invadopodia exhibiting E-cadherin per cell. Means from 3 (D) or 4 (E) independent experiments indicated with coloured squares. Errors bars represent mean  $\pm$  SEM. Bottom panels: Equal amounts of cell lysate (25  $\mu$ g) were subjected to SDS-PAGE, then transferred onto PVDF membrane. Graphs represent the mean  $\pm$  SEM of Rab7 or Rab11 protein expression from 3 independent cell transfection.

(F) E-cadherin and Rab7; (G) E-cadherin and Rab11; (H) MT1-MMP and Rab7; (I) MT1-MMP and Rab11. Z-stack confocal acquisitions were performed on fixed cells. Left panels: The amplification spots (red) localize with a degradation spot of the fluorescent gelatin (green). Scale bars represent 2  $\mu$ m. Right panels: Fluorescence intensity quantification of the regions of interest indicated by the yellow square on the left panel. Images in 2D view for (C) and (F-I) are available in *Fig.S4B* and negative control (PLA probe PLUS/MINUS) is available in *Fig.S4D*.

(F-I): A representative image of 2 experiments in triplicates with 3 acquisitions for each (n=2).

#### **Fig.4: E-cadherin adhesive activity is required for invadopodia formation.**

(A-C) Invadopodia assays were performed using BxPC-3 control (shCTRL) and E-cadherin depleted cells (shEcad) cell lines. (A) The number of cells exhibiting active invadopodia were quantified. Means from 3 independent experiments are indicated with coloured squares. Errors bars represent Mean  $\pm$  SEM. n=3 (B) The normalized gelatin degradation area at the ventral surface of the cells was evaluated. Means from 3 independent experiments are indicated with coloured squares. Errors bars represent mean  $\pm$  SEM. n=3. (C) The distribution of the number of invadopodia per cell was determined A representative graph of 3 experiments (n=3).

Images in 2D view for (A) are available in *Fig.S4C*.



708 **(D-E)** Invadopodia assays were performed using PDAC021T Mock (no E-cadherin expression) and  
709 PDAC021T Ecad, (E-cadherin expression) cells. The E-cadherin expression was assessed by western  
710 blot. The normalized gelatin degradation area at the ventral surface of the cells were evaluated.  
711 Representative results from 3 independent experiments.

712 **(F)** E-cadherin and  $\beta$ -catenin interact within invadopodia. E-cadherin- $\beta$ -catenin complexes were  
713 detected using a PLA. Z-stack confocal acquisitions were performed. Top panel: the amplification  
714 spot (red) localizes in a degradation spot of FITC-labelled gelatin (green). Bottom panel: fluorescence  
715 intensity quantification of the region of interest indicated by the yellow square on the top panel. Scale  
716 bar represents 2  $\mu$ m. A representative image of 2 experiments in triplicates with 3 acquisitions for  
717 each (n=2). Images in 2D view for **(F)** is available in *Fig.S4D*.

718 **(G)** E-cadherin inhibition decreases invadopodia formation. Ratio of cells exhibiting active  
719 invadopodia in treated (AS9 or AS11) and untreated (DMSO) BxPC-3 cells were evaluated. Means  
720 from 3 independent experiments are indicated with coloured squares. Raw data are shown with  
721 coloured dots. Errors bars represent mean  $\pm$  SEM. n=3. **(H)** Invadopodia assays were performed  
722 using BxPC-3 shCTRL. Cells were seeded for 2h on coverslips coated with FITC-labelled gelatin,  
723 then treated for 16h with DMSO or AS11. Cells were then washed and incubated in DMEM/10%  
724 fetal calf serum for an additional 24h period. Invadopodia formation was analysed by  
725 videomicroscopy by capturing images every hour, 8h after addition of the compounds. The number  
726 of gelatin degradation zones appearing just below the cell body is estimated for each hour. The graph  
727 is representative of an experiment carried out three times (n=3).

728  
729 **Fig.5: An E-cadherin/Arp3 complex is detected into invadopodia.**

730 **(A)** Most deregulated signalling pathways in BxPC-3 shEcad compared with BxPC-3 shCTRL cells  
731 as determined by IPA analysis of proteome data. The enrichment score on the graphic is represented  
732 by  $-\log(p\text{-value})$ . n=3 **(B)** Heatmap of the Z-score of E-cadherin (CDH1) expression, RALB and  
733 proteins associated with actin nucleation through Arp2/3 complex pathway in BxPC3 shEcadh cells  
734 compared with BxPC3 shCTRL cells. Red and grey denote increase and decrease in protein  
735 expression, respectively. Three independent protein extractions were analysed (#1, #2, #3). n=3 **(C)**  
736 Western blot analysis of Arp3 expression in BxPC-3 shCTRL and shEcad cell lines. Equal amounts  
737 of cell lysate (25 $\mu$ g) were loaded on 8% polyacrylamide gel. After SDS-PAGE migration and  
738 transfer onto PVDF membrane, E-cadherin, Arp3 and actin were detected using specific antibodies.  
739 Bottom panel: representative western blot from 6 independent cells lysates. Top panel: Quantification  
740 of Arp3 expression from mean  $\pm$  SEM. (n=6).

741 **(D, E)** Protein-protein interactions in invadopodia revealed by PLA. **(D)** Arp3-Cortactin and **(E)**  
742 Arp3-E-cadherin interactions. Z-stack confocal acquisitions were performed on fixed cells. Top

743 panels: The amplification spots (red) localize with a degradation spot of FITC-labelled gelatin  
744 (green). Cell nuclei are shown in blue. Bottom panels: Fluorescence intensity quantification of the  
745 region of interest indicated by the yellow square on the left panel. Scale bar represents 2 $\mu$ m. **(D)**: A  
746 representative image of 2 experiments in triplicates with 3 acquisitions for each (n=2). **(E)**: A  
747 representative image of 2 experiments in triplicates with 3 acquisitions for each (n=2). Images in 2D  
748 view for **(E)** are available in *Fig.S4D* and and negative control for **(D-E)** is available in *Fig.S4D*.  
749 **(F)** BxPC-3 cells were treated for 48h with control siRNA (siCTRL) or siRNA against the Arp3  
750 subunit (siArp3). Arp3 protein expression in BxPC-3 cells treated by siCTRL or siArp3. Equal  
751 amounts of cell lysate (25 $\mu$ g) were subjected to SDS-PAGE, then transferred onto PVDF membrane.  
752 Arp3 and actin were detected using specific antibodies. The graph represents the mean  $\pm$  SEM of  
753 Arp3 protein expression from 3 independent cell transfection. n=3.  
754 **(G)** After a treatment during 48h with control siRNA (siCTRL) or siRNA against the Arp3 subunit  
755 (siArp3) cells were plated for 16h onto FITC-labelled gelatin. The graph represents the quantification  
756 of active invadopodia formed per cell. Data corresponds to a mean from three independent  
757 experiments indicated with coloured squares. Errors bars represent mean  $\pm$  SEM. n=3.

758  
759 **Fig.6: E-cadherin is a structuring component of invadopodia.**

760 Invadopodia assays were performed as previously described. **(A, B)** After confocal acquisition,  
761 analysis of structures evidence 3 kinds of invadopodia: step 1 initiation: In the absence of FITC-  
762 labelled gelatin degradation actin ring overlays with E-cadherin ring, step 2 maturation: spot of  
763 associated with both actin and E-cadherin ring, step3: FITC-labelled gelatin degradation associated  
764 with actin spot in the presence or absence of E-cadherin. **(B)**, Percentage of cells showing these kinds  
765 of structure(n=2).

766 **(C-F)** Images of Invadopodia assays were acquired using AiryScan module of Zeiss LSM 880  
767 confocal microscope. Acquisitions were performed inside the gelatin sheet every 0.22 $\mu$ m. Bottom  
768 indicated the bottom detection of gelatin. In **(C)**, labelling of both Actin E-cadherin are given for  
769 each section. Intensity quantifications were performed using FIJI software and the maximal intensity  
770 for Actin and E-cadherin is mentioned by a black or red box, respectively. In **(D)** Z-labelling ranges  
771 are positioned with bars and the section with the more intense labelling is mentioned by a dark line.  
772 Dark bars represent the average of A, B, C, D structures. **(F)** Actin (magenta) and E-cadherin (cyan)  
773 staining detected 1,1  $\mu$ m above the gelatin bottom using AiryScan module. Peaks represent labelling  
774 intensity of each molecule at this Z-section.

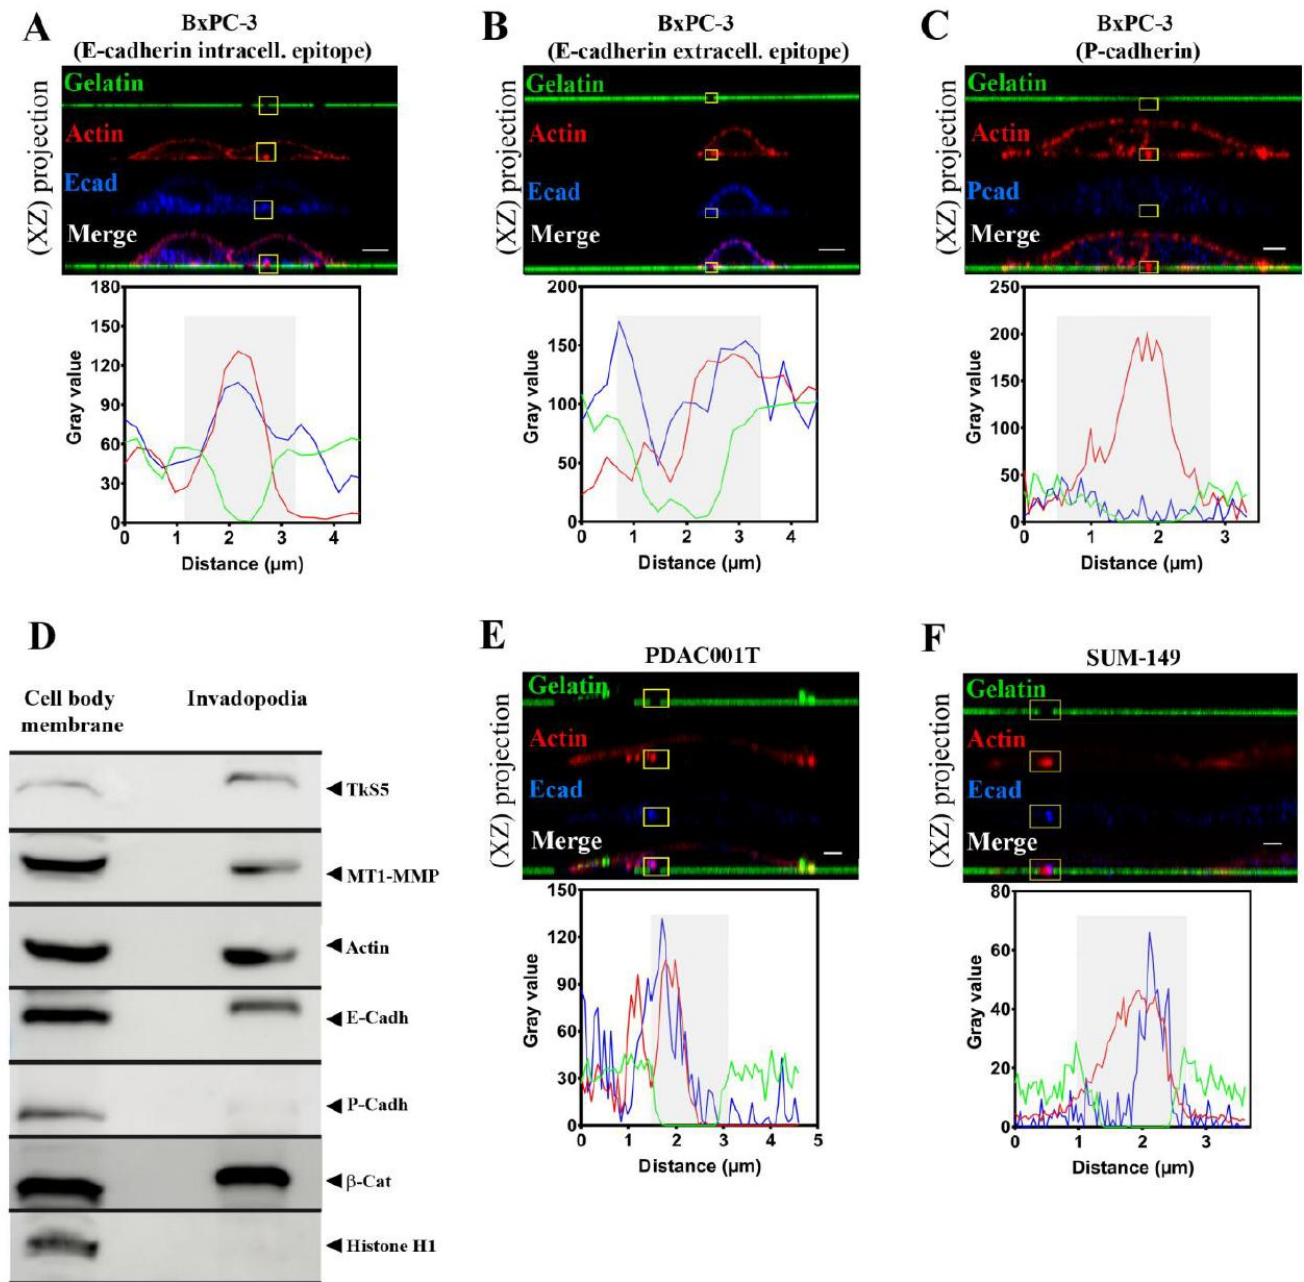

**Fig.1: E-cadherin localizes within invadopodia**

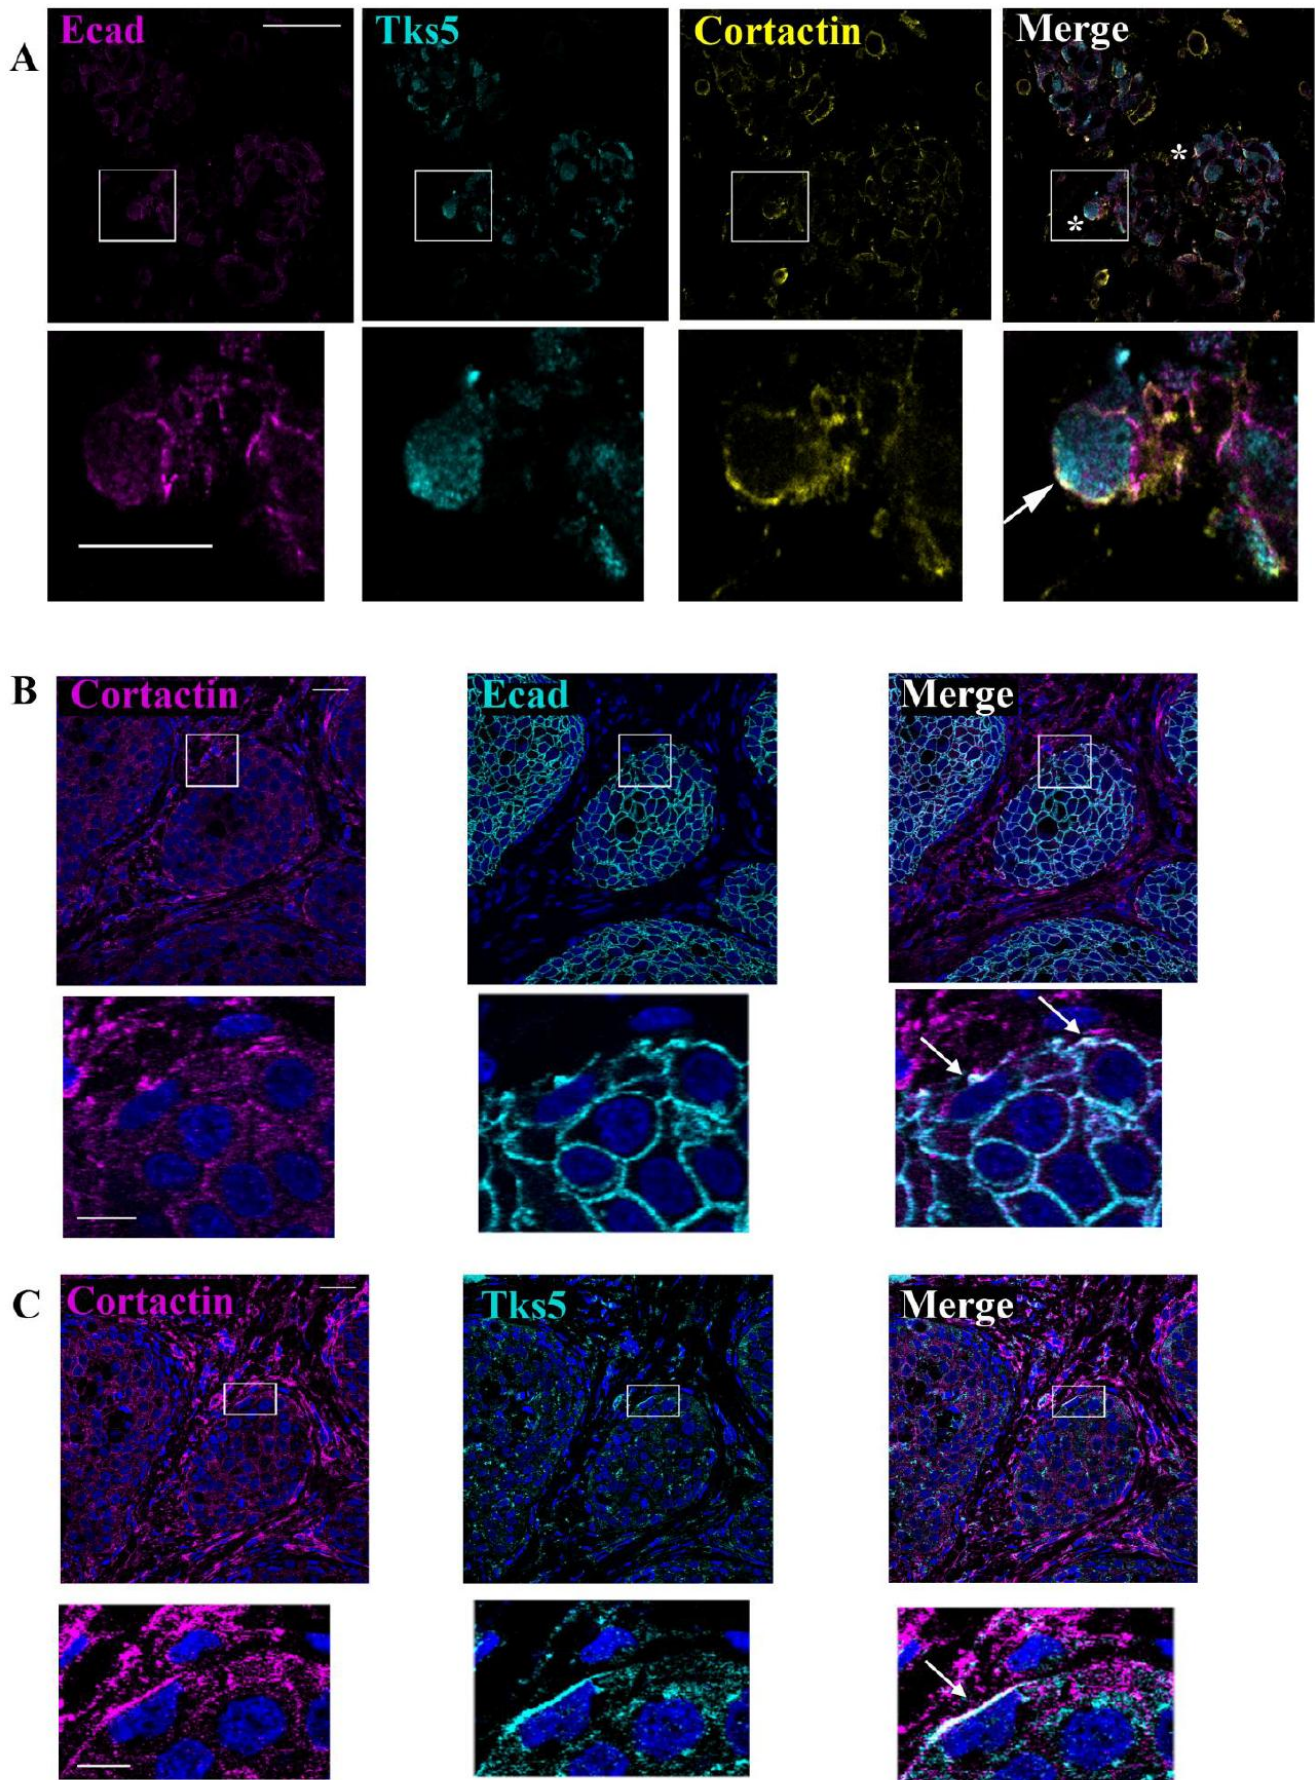

**Fig.2: E-cadherin localizes in invadopodia-like structures**

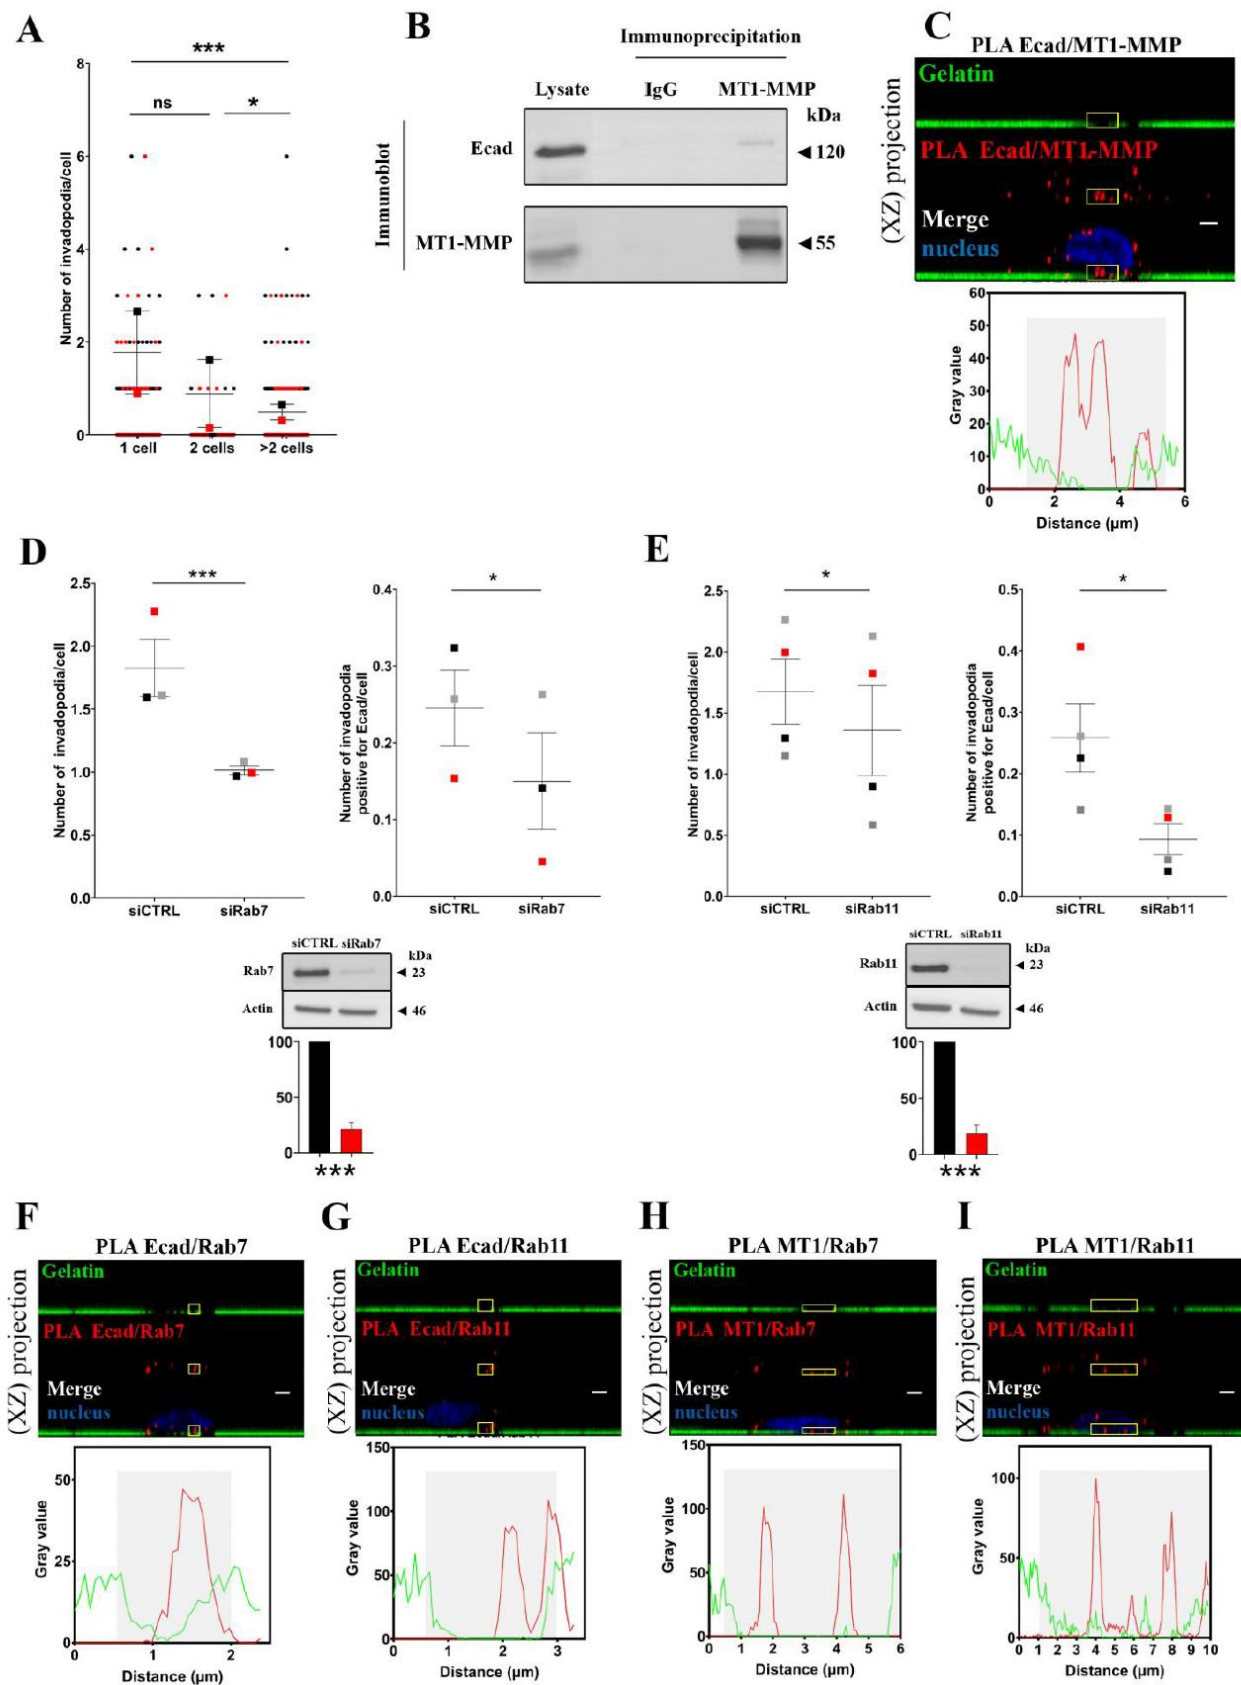

**Fig.3: E-cadherin interacts with MT1-MMP in invadopodia and is recycled through Rab7 and Rab11 pathways**

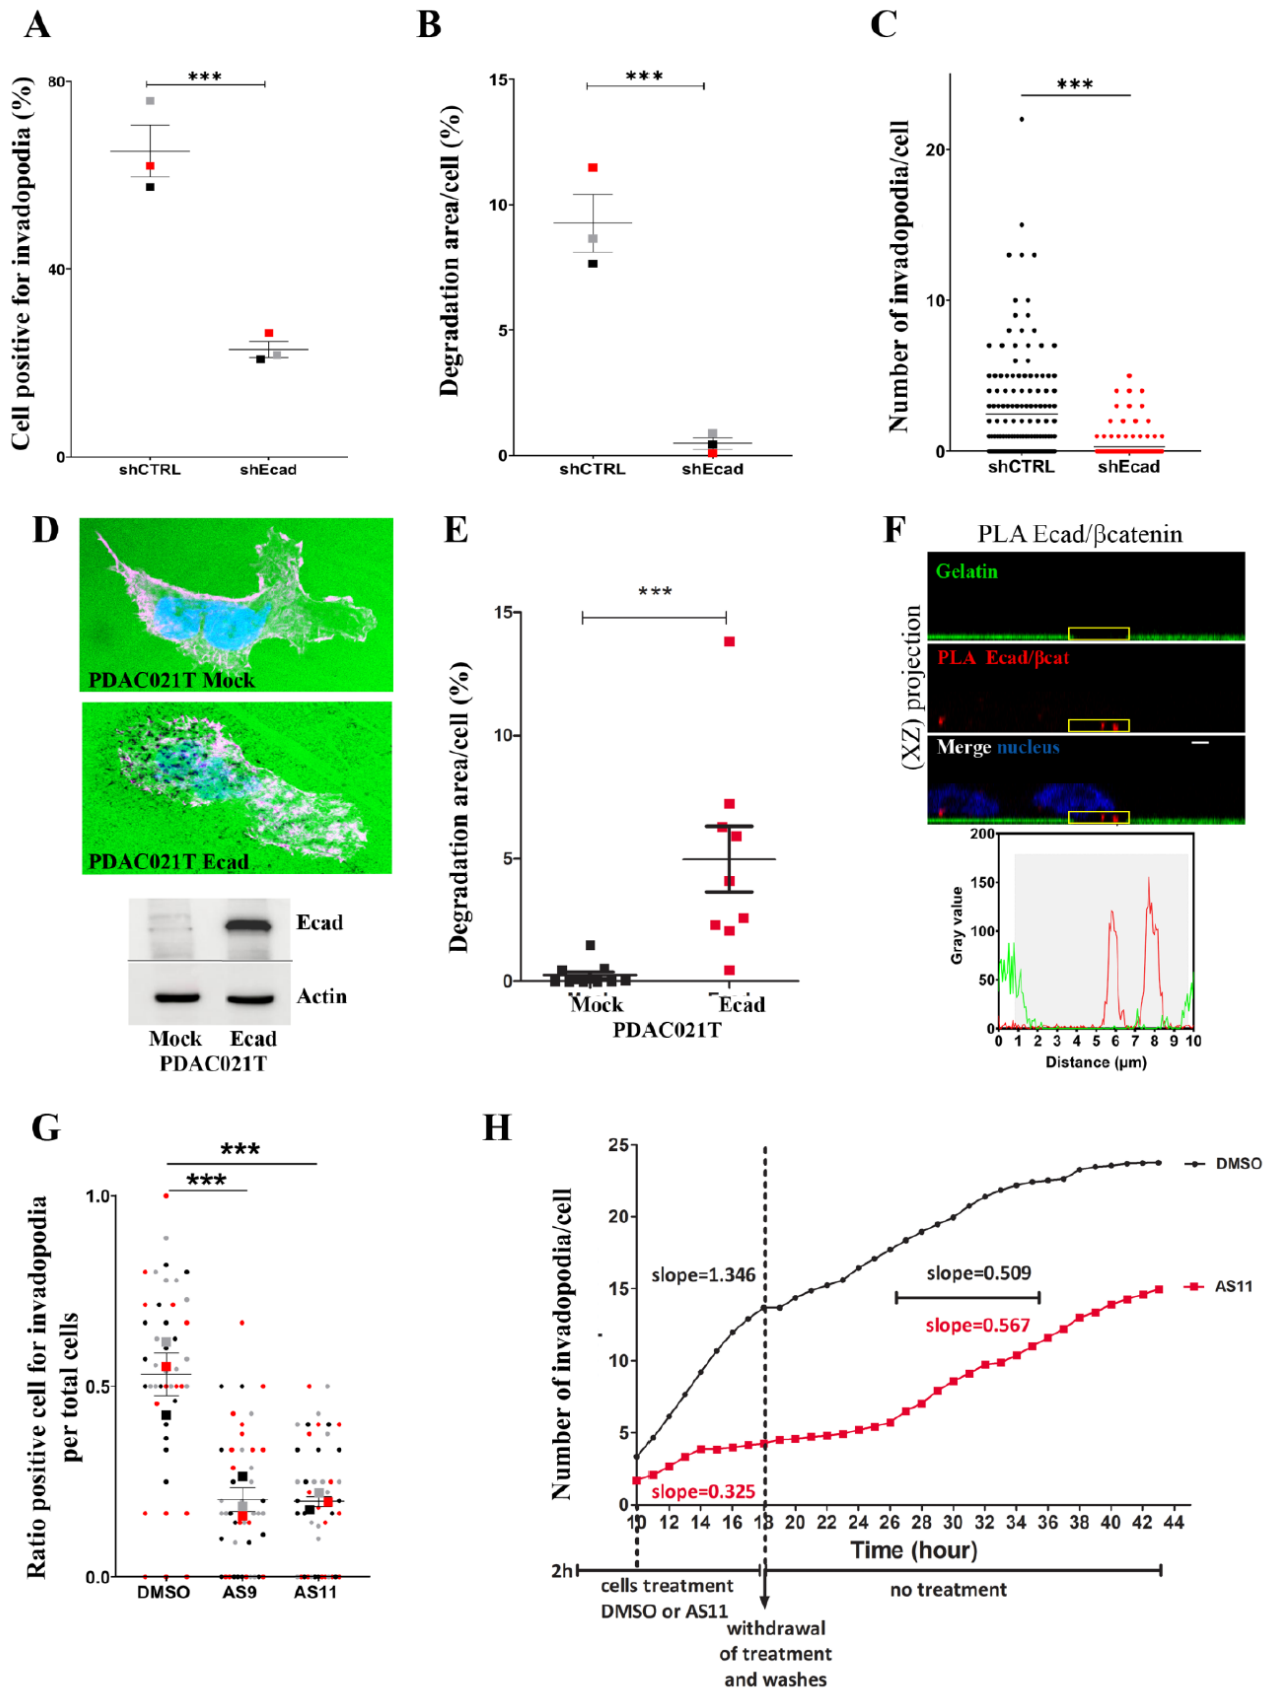

Fig.4: E-cadherin adhesive activity is required for invadopodia formation

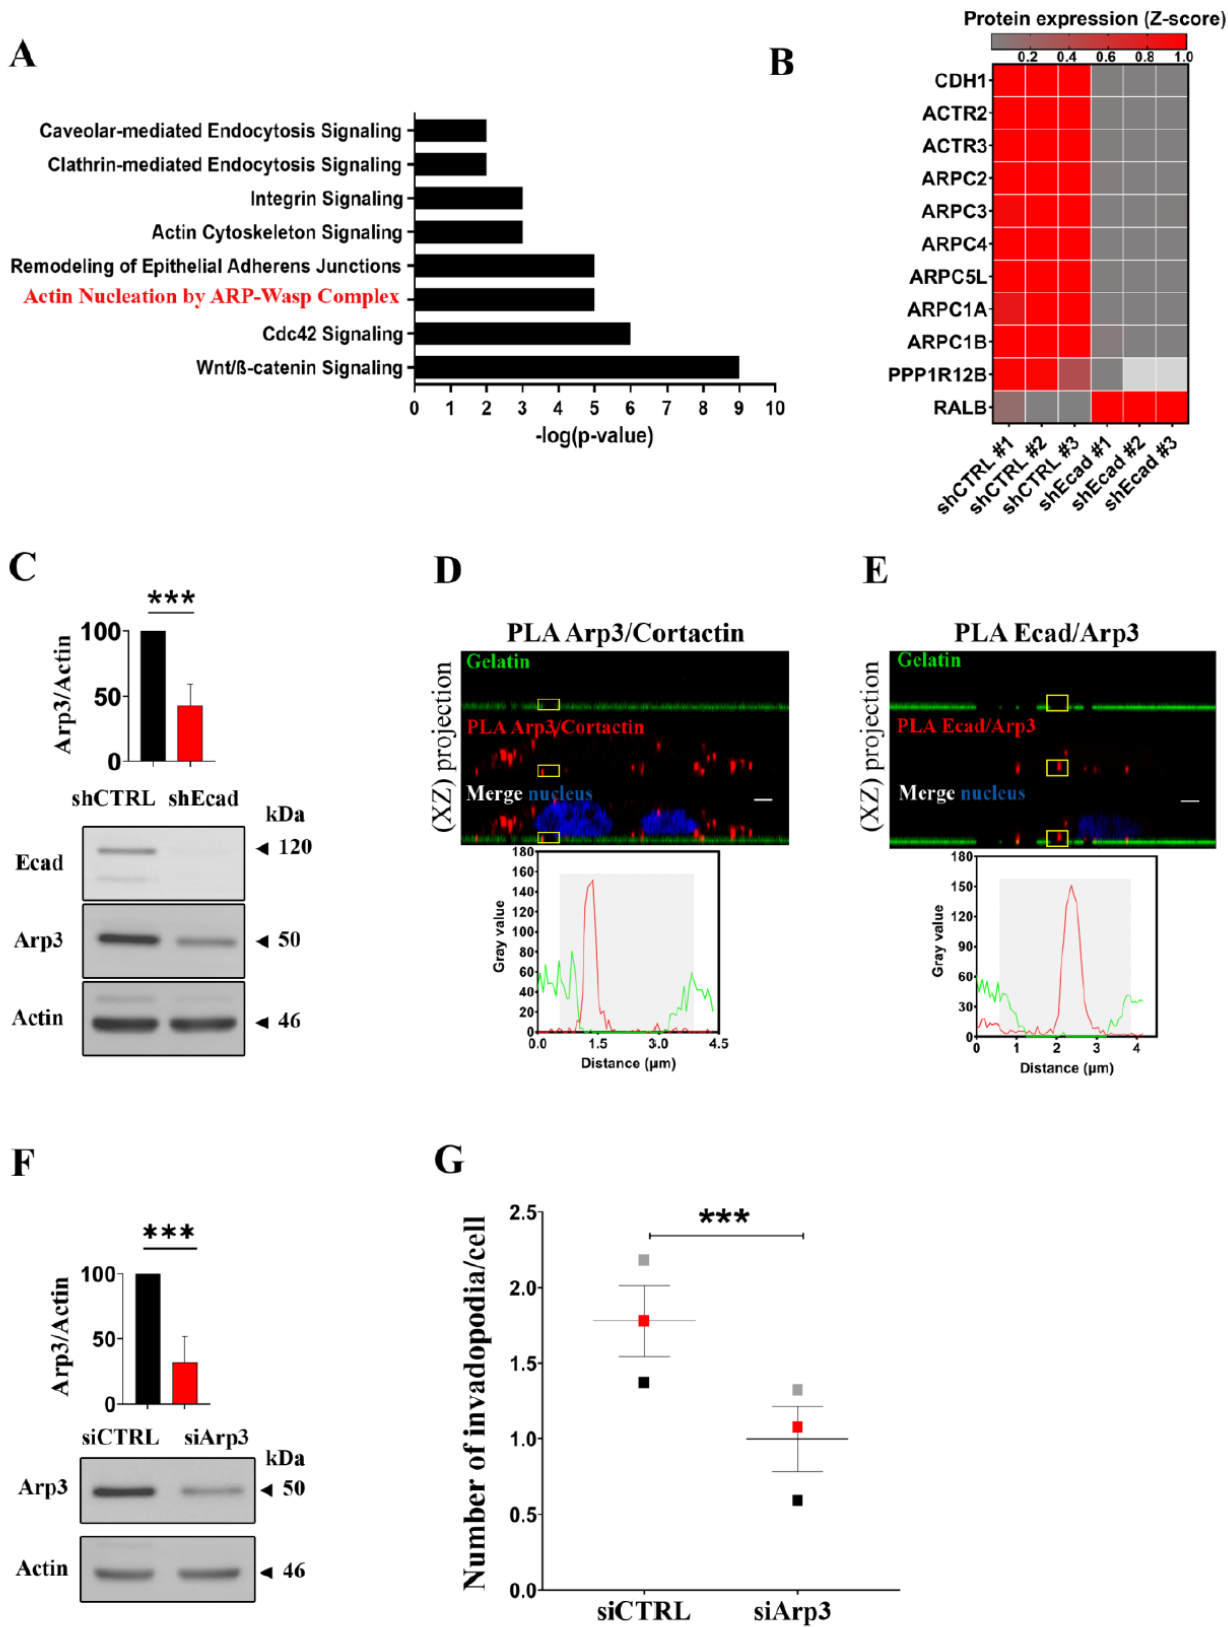

Fig.5: An E-cadherin/Arp3 complex is detected into invadopodia

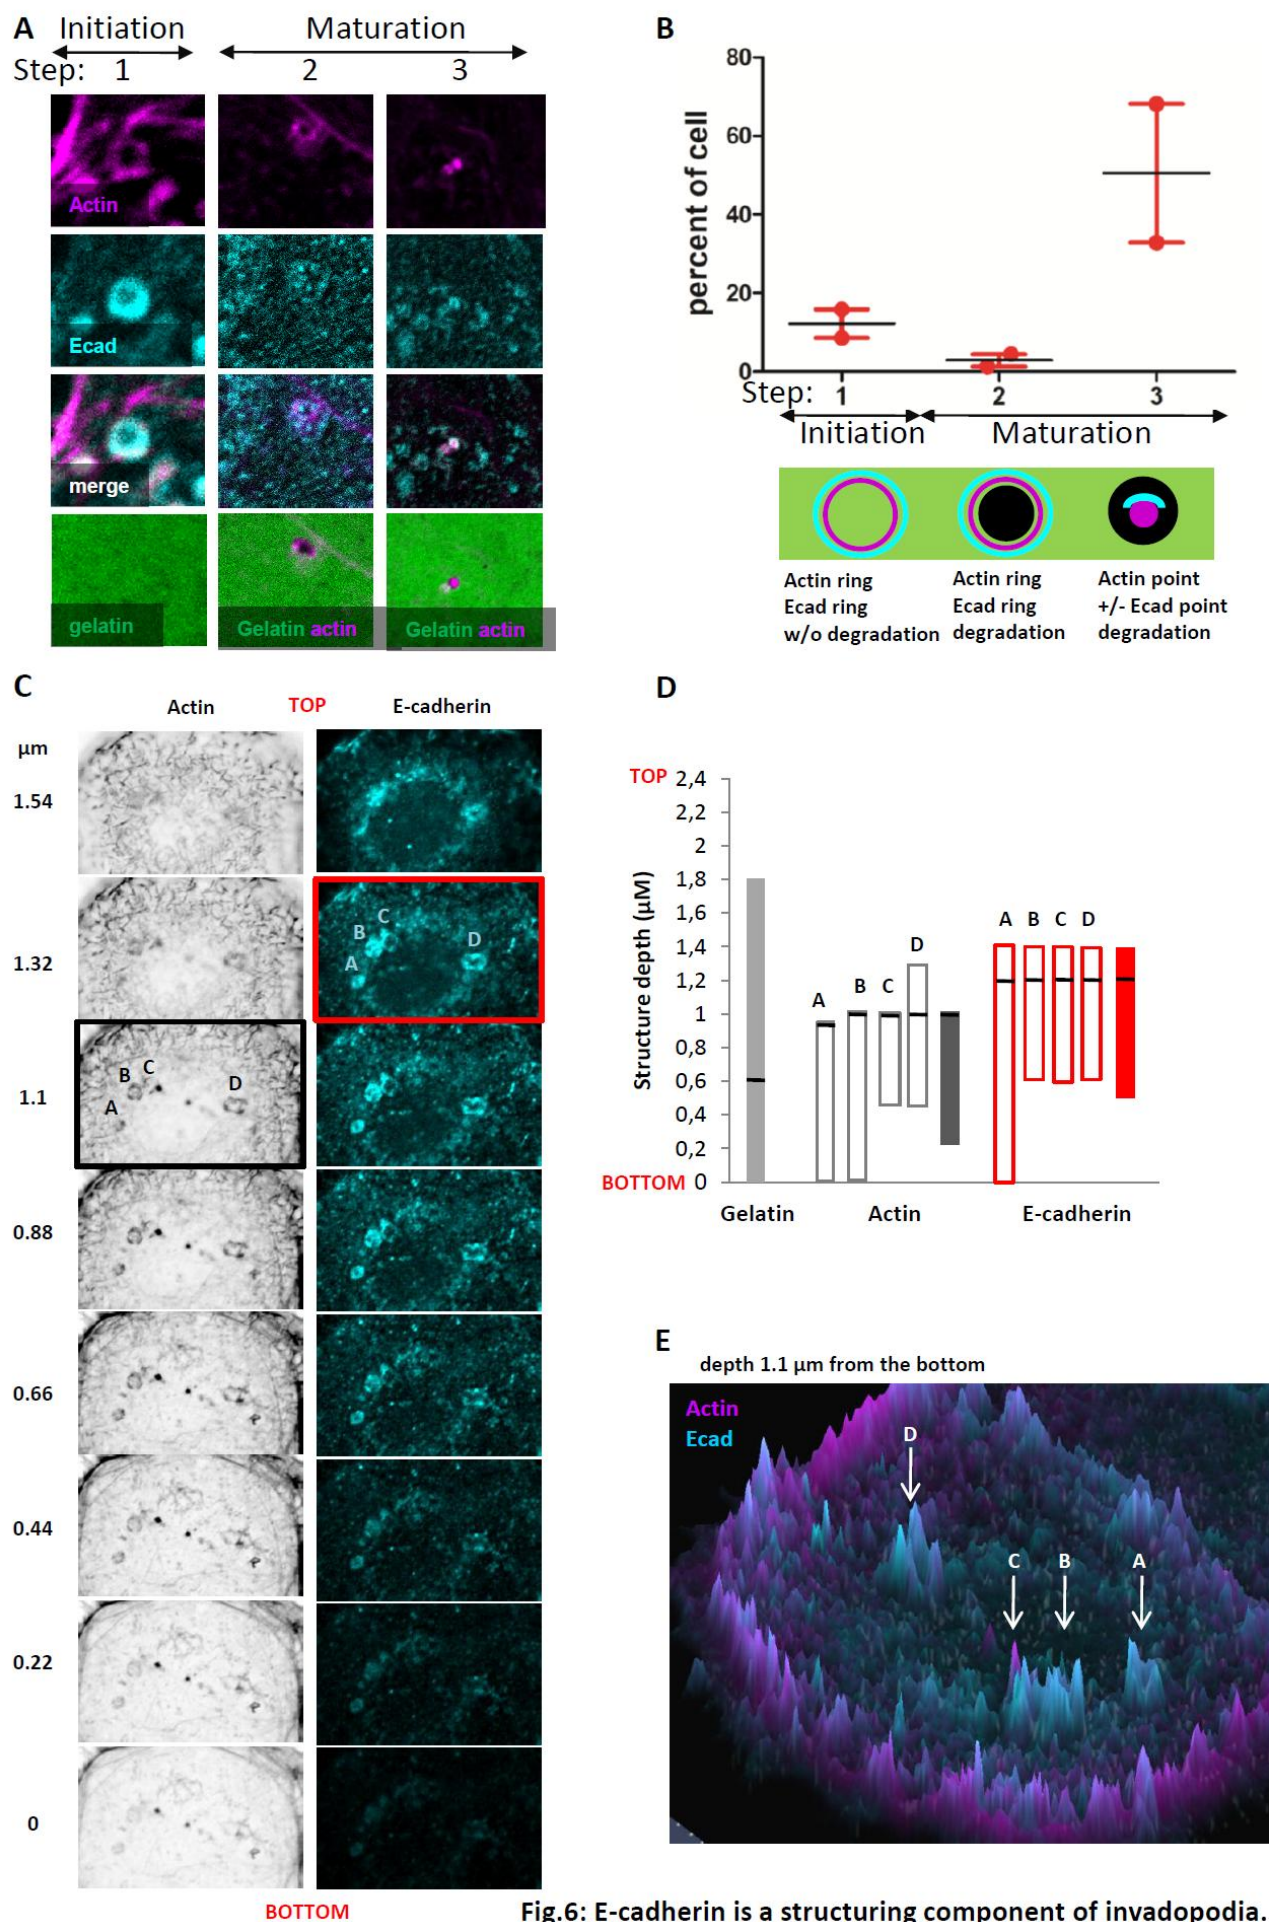

Fig.6: E-cadherin is a structuring component of invadopodia.



## 782 Additional Data 1

783  
784 **Mass spectrometry analysis and data processing protocol.** Proteomes from E-cadherin depleted  
785 cells (BxPC-3 shEcad) were compared to control cells (BxPC-3 shCTRL) by label-free quantitative  
786 mass spectrometry analysis. 15 µg of each cell lysate was loaded on NuPAGE 4-12% Bis-Tris  
787 acrylamide gels (Life Technologies) to stack proteins in a single band that was stained with Imperial  
788 Blue (Thermo Fisher Scientific) and cut from the gel. Gel pieces were submitted to an in-gel trypsin  
789 digestion (Shevchenko *et al*, 1996). Peptides were extracted from the gel and dried under vacuum.  
790 Samples were reconstituted with 0.1% trifluoroacetic acid in 4% acetonitrile and analyzed by liquid  
791 chromatography (LC)-tandem mass spectrometry (MS/MS) using an Orbitrap Fusion Lumos Tribrid  
792 Mass Spectrometer (Thermo Electron, Bremen, Germany) with a nanoRSLC Ultimate 3000  
793 chromatography system (Dionex, Sunnyvale, CA). Peptides were separated on a Thermo Scientific  
794 Acclaim PepMap RSLC C18 column (2 µm, 100A, 75 µm × 50 cm). For peptide ionization in the  
795 EASY-Spray nanosource in front of the Orbitrap Fusion Lumos Tribrid Mass Spectrometer, spray  
796 voltage was set at 2.2 kV and the capillary temperature at 275 °C. The Orbitrap Lumos was used in  
797 data-dependent mode to switch consistently between MS and MS/MS. The time between master  
798 scans was set to 3 seconds. MS spectra were acquired with the Orbitrap in the range of m/z 400–1600  
799 at a FWHM resolution of 120,000 measured at 400 m/z. AGC target was set at 4.0e5 with a 50 ms  
800 maximum injection time. For internal mass calibration, the 445.120025 ions were used as lock mass.  
801 The more abundant precursor ions were selected, and collision-induced dissociation fragmentation  
802 was performed in the ion trap to have maximum sensitivity and yield a maximum amount of MS/MS  
803 data. Number of precursor ions was automatically defined along run in 3 s windows using the “Inject  
804 Ions for All Available parallelizable time option” with a maximum injection time of 300 ms. The  
805 signal threshold for an MS/MS event was set to 5,000 counts. Charge state screening was enabled to  
806 exclude precursors with 0 and 1 charge states. Dynamic exclusion was enabled with a repeat count of  
807 1 and duration of 60 s.

808 Relative intensity-based label-free quantification (LFQ) was processed using the MaxLFQ algorithm  
809 from the freely available MaxQuant computational proteomics platform, version 1.6.3.4. Spectra  
810 were searched against the human database extracted from UniProt on the 1<sup>st</sup> September 2020, which  
811 produced 20,375 entries (reviewed). The false discovery rate (FDR) at the peptide and protein levels  
812 were set to 1% and determined by searching a reverse database. For protein grouping, all proteins  
813 that could not be distinguished on the basis of their identified peptides were assembled into a single  
814 entry according to the MaxQuant rules. Statistical analysis was done with Perseus program (version  
815 1.6.14.0) from the MaxQuant environment ([www.maxquant.org](http://www.maxquant.org)). Quantifiable proteins were defined

816 as those detected in above 70% of samples in one condition or more. To obtain a normal distribution,  
817 protein LFQ normalized intensities transformed using base 2 logs. Missing values were replaced  
818 using data imputation by randomly selecting from a normal distribution centred on the lower edge of  
819 the intensity values that simulates signals of low abundant proteins using default parameters (a  
820 downshift of 1.8 standard deviation (s.d.) and a width of 0.3 of the original distribution). To  
821 determine whether a given detected protein was specifically differential, a two-sample *t*-test was  
822 done using permutation-based FDR-controlled at 0.01 and employing 250 permutations. The *p* value  
823 was adjusted using a scaling factor *s*<sub>0</sub> with a value of 0.4. Analysis was done on biological triplicates,  
824 each run three times on mass spectrometers. The mass spectrometry proteomics data have been  
825 deposited to the ProteomeXchange Consortium via the PRIDE (Perez-Riverol *et al*, 2019) partner  
826 repository with the dataset identifier PXD021795.

827

## 828 Legends to supplementary figures

### 830 **Fig.S1: Invadopodia characterization in BxPC-3.**

831 (A-C) BxPC-3 cells were plated for 16h onto FITC-labelled gelatin then fixed. Actin, Tks5 and MT1-  
832 MMP were immunostained. (A) Actin (red) and Cortactin (blue), (B) Actin (red) and Tks5 (blue),  
833 (C) Actin (red) and MT1-MMP (blue). Z-stack acquisitions were then performed. Top panels:  
834 Colocalization of actin spots with a degradation zone of the gelatin (black spot) represents active  
835 invadopodia. Scale bar = 2  $\mu$ m. Bottom panels: Fluorescence intensity quantification of the region of  
836 interest indicated by the yellow square on the left panel. The gelatin degradation area is identified in  
837 grey. (A-C) A representative image of 5 experiments with 3 acquisitions for each (n=5).

838 Images in 2D view for (A-C) are available in *Fig.S4A*

839 (D) Quantification of gelatin degradation area at the ventral surface of treated (GM6001 inhibitor)  
840 and control (DMSO-treated) BxPC-3 cells. (E) Ratio of positive cells for active invadopodia in  
841 treated (GM6001 inhibitor) and control (DMSO-treated) BxPC-3 cells. (F) Quantification of gelatin  
842 degradation area at the ventral surface of siCTRL or siMT1-MMP treated cells. (G) Ratio of cells  
843 exhibiting active invadopodia in siCTRL and siMT1-MMP treated cells... (D-G) 10 microscopic  
844 fields are quantified for each condition of the 3 experiments; Mean from 3 independent experiments  
845 are indicated with coloured squares Errors bars represent Mean  $\pm$  SEM (H) Western blot analysis of  
846 MT1-MMP protein expression in BxPC-3 siCTRL and siMT1-MMP cells. BxPC-3 cells were treated  
847 for 48h with siRNA control (siCTRL) or siRNA against MT1-MMP (siMT1-MMP). MT1-MMP and  
848 actin were detected using specific antibodies. The graph represents the mean  $\pm$  SEM from three  
849 independent cell transfections. n=3

### 852 **Fig.S2: videos for invadopodia dynamic**

853 Invadopodia assays were performed using BxPC-3 shCTRL. Cells were seeded for 2h on coverslips  
854 coated with FITC-conjugated gelatin, then treated for 16h with DMSO (A and B) or AS11 (C and D).  
855 Cells were then washed and incubated in DMEM/10% fetal calf serum for an additional 24h period.  
856 Invadopodia formation was analysed by videomicroscopy by capturing images every hour, 8h after  
857 addition of the compounds. A and C represent bright field images; B and D represent gelatin  
858 degradation areas. The number of gelatin degradation zones appearing just below the cell body is  
859 estimated for each hour.

860 The graph (representative of an experiment carried out three times) is available in Fig. 4H

862 **Fig.S3: Central interactome for E-cadherin.**

863 Proteins identified by mass spectrometry were analysed using Ingenuity Pathway Analysis (IPA).  
864 The central interactome for E-cadherin was built with IPA software showing deregulated proteins  
865 identified by mass spectrometry.

866

867 **Fig.S4: Controls for invadopodia imagery**

868 (A): 2D view of invadopodia labelling presented in Fig. 1 and Fig. S1.

869 (B): 2D view of invadopodia labelling presented in Fig. 3.

870 (C): 2D view of invadopodia labelling presented in Fig. 4A.

871 (D): 2D view of PLA labelling (presented in Fig. 4) and negative control of PLA (presented in Fig. 3  
872 and 5).

873

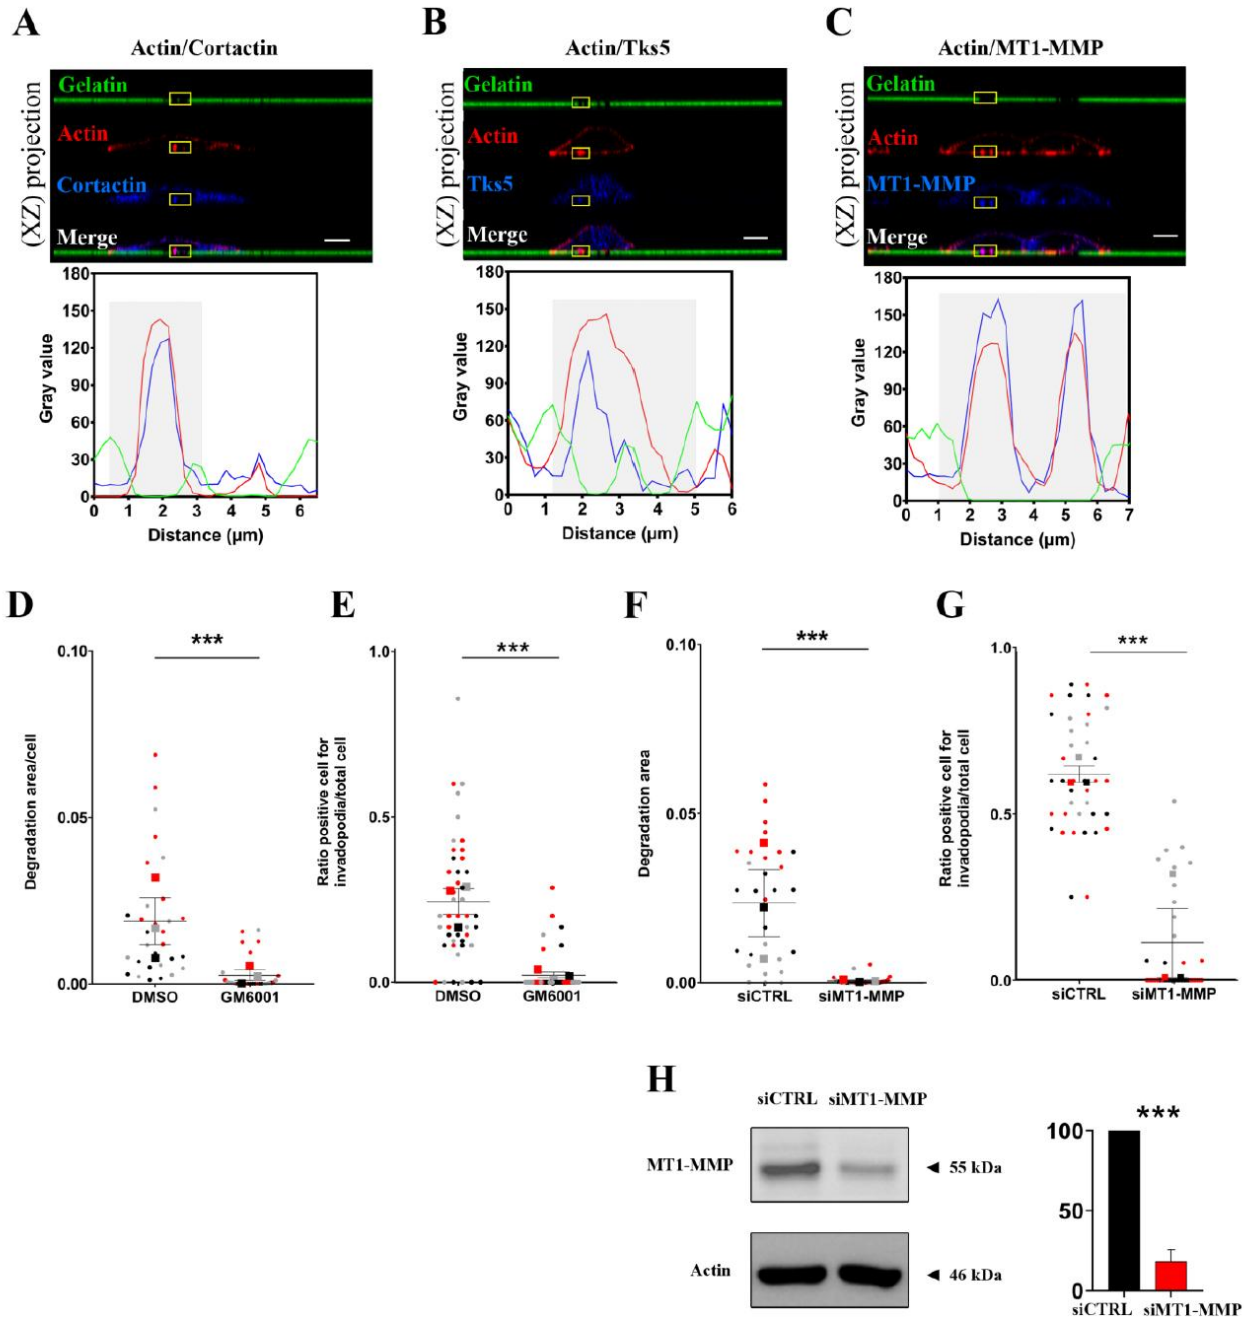

Fig.S1: Invadopodia characterization in BxPC-3

**A**

**DMSO**

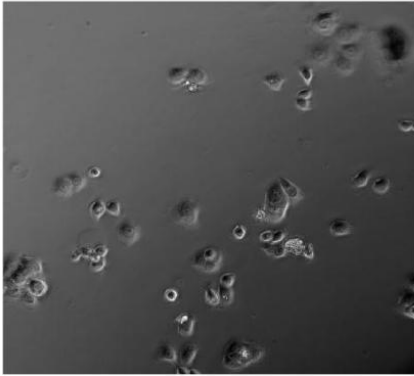

**B**

**DMSO gelatin**

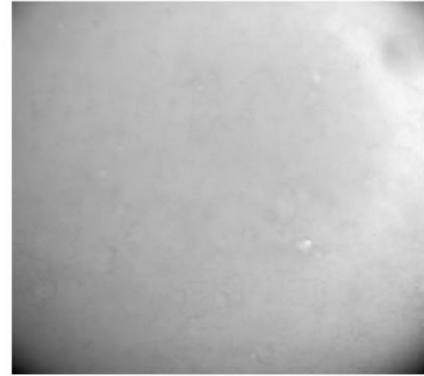

**C**

**AS11**

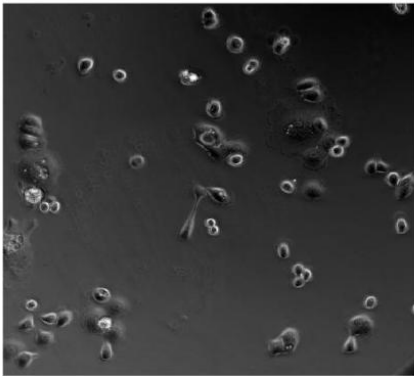

**D**

**AS11 gelatin**

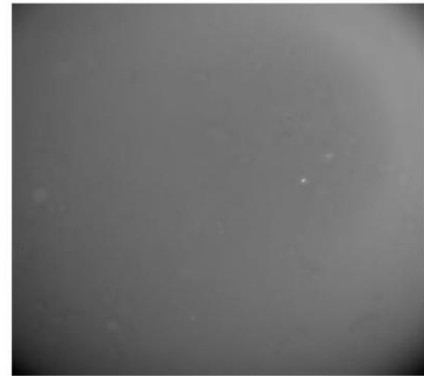

[Link for videos](#)

**Fig.S2: videos for invadopodia kinetics**

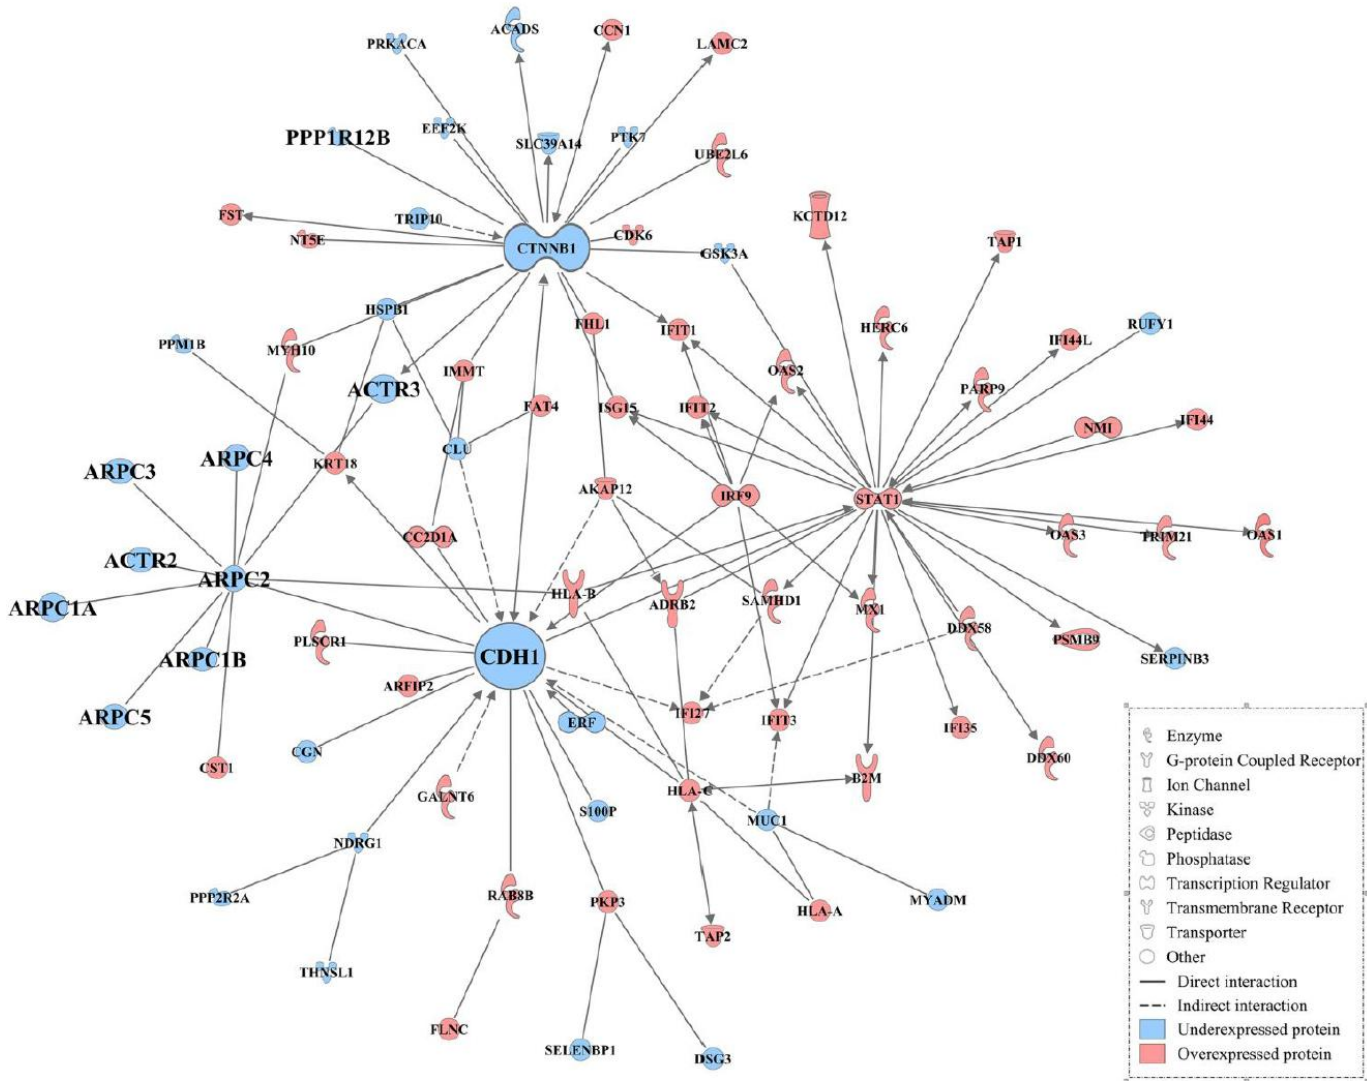

**Fig.S3: Central interactome for E-cadherin.**

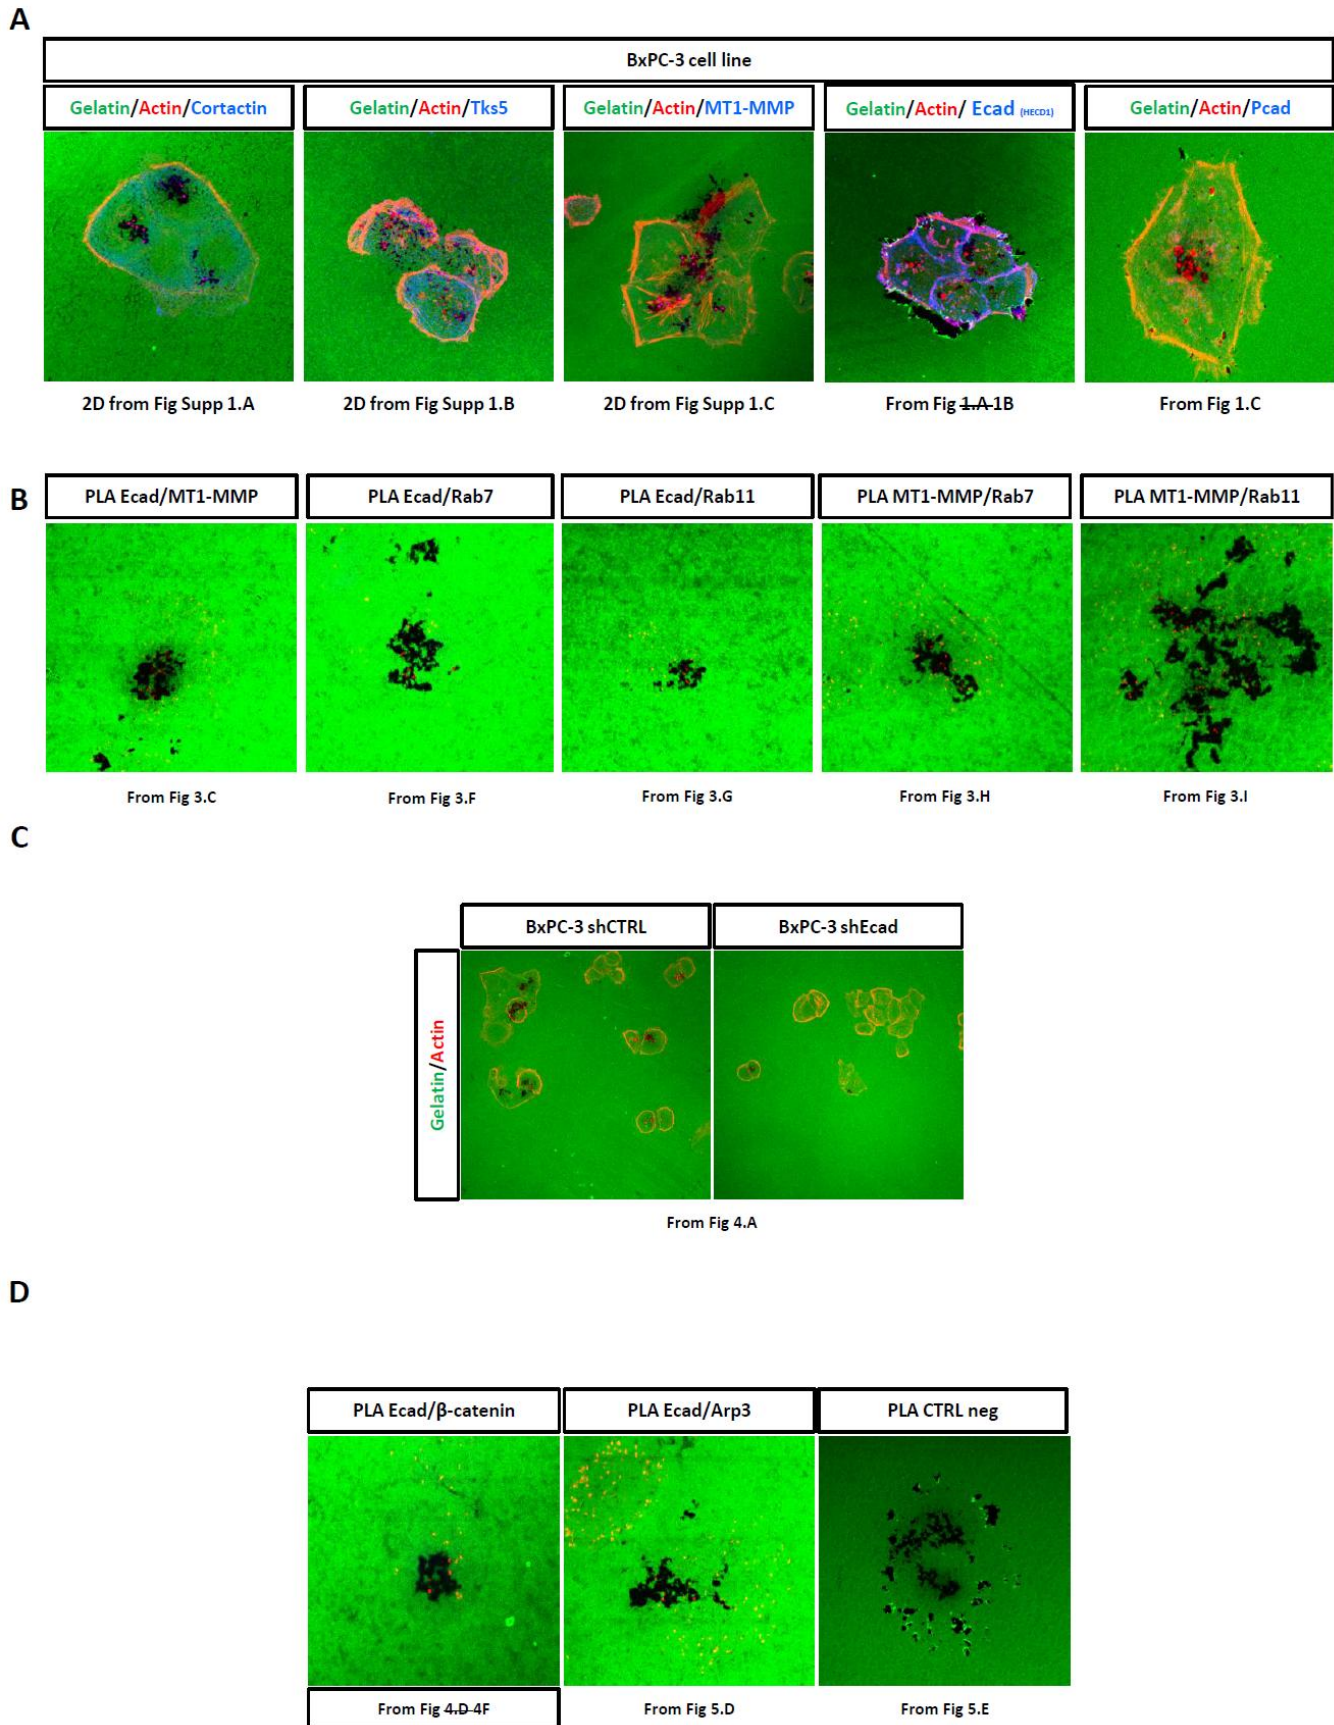

Fig.S4: Controls for invadopodia imagery
